1 **Genetic deletion of genes in the cerebellar rhombic lip lineage can stimulate**  
2 **compensation through adaptive reprogramming of ventricular zone-derived**  
3 **progenitors**

4

5

6 Alexandre Wojcinski<sup>1</sup>, Morgane Morabito<sup>1</sup>, Andrew K. Lawton<sup>1</sup>, Daniel N. Stephen<sup>1</sup>, and  
7 Alexandra L. Joyner<sup>1,2,3</sup>

8

9 <sup>1</sup>Developmental Biology Program, Sloan Kettering Institute, New York, NY

10

11 <sup>2</sup>Biochemistry, Cell and Molecular Biology Program, Weill Cornell Graduate School of  
12 Medical Sciences, New York, NY, 10065, USA

13

14 <sup>3</sup>Corresponding author

15 Alexandra L. Joyner

16 Developmental Biology Program

17 Sloan Kettering Institute

18 1275 York Avenue, Box 511

19 New York, NY 10065

20 Office: 212-639-3962, Fax: 212-717-3738

21 Email: joynera@mskcc.org

22

23

24 **Abstract:**

25 **Background:** The cerebellum is a foliated posterior brain structure involved in  
26 coordination of motor movements and cognition. The cerebellum undergoes rapid growth  
27 postnatally due to Sonic Hedgehog (SHH) signaling-dependent proliferation of ATOH1+  
28 granule cell precursors (GCPs) in the external granule cell layer (EGL), a key step for  
29 generating cerebellar foliation and the correct number of granule cells. Due to its late  
30 development, the cerebellum is particularly vulnerable to injury from preterm birth and  
31 stress around birth. We recently uncovered an intrinsic capacity of the developing  
32 cerebellum to replenish ablated GCPs via adaptive reprogramming of Nestin-expressing  
33 progenitors (NEPs). However, whether this compensation mechanism occurs in mouse  
34 mutants affecting the developing cerebellum and could lead to mis-interpretation of  
35 phenotypes was not known.

36 **Methods:** We used two different approaches to remove the main SHH signaling activator  
37 GLI2 in GCPs: 1) our mosaic mutant analysis with spatial and temporal control of  
38 recombination (MASTR) technique to delete *Gli2* in a small subset of GCPs; 2) An  
39 *Atoh1-Cre* transgene to delete *Gli2* in most of the EGL. Genetic Inducible Fate Mapping  
40 (GIFM) and live imaging were used to analyze the behavior of NEPs after *Gli2* deletion.

41 **Results:** Mosaic analysis demonstrated that SHH-GLI2 signaling is critical for generating  
42 the correct pool of granule cells by maintaining GCPs in an undifferentiated proliferative  
43 state and promoting their survival. Despite this, inactivation of *GLI2* in a large proportion  
44 of GCPs in the embryo did not lead to the expected dramatic reduction in the size of the  
45 adult cerebellum. GIFM uncovered that NEPs do indeed replenish GCPs in *Gli2*

46 conditional mutants, and then expand and partially restore the production of granule cells.  
47 Furthermore, the SHH signaling-dependent NEP compensation requires *Gli2*,  
48 demonstrating that the activator side of the pathway is involved.

49 **Conclusion:** We demonstrate that a mouse conditional mutation that results in loss of  
50 SHH signaling in GCPs is not sufficient to induce long term severe cerebellum  
51 hypoplasia. The ability of the neonatal cerebellum to regenerate after loss of cells via a  
52 response by NEPs must therefore be considered when interpreting the phenotypes of  
53 conditional mutants affecting GCPs.

54 **Keywords:** Cerebellum, SHH signaling, GLI2, Nestin-expressing progenitors, Adaptive  
55 reprogramming, *Atoh1-Cre*, Regeneration

56 **Abbreviations:** CB: Cerebellum; SHH: Sonic Hedgehog; EGL: External Granule Layer;  
57 GCP: Granule Cell Precursor; NEP: Nestin-expressing progenitor; MASTR: mosaic  
58 mutant analysis with spatial and temporal control of recombination; GIFM: Genetic  
59 Inducible Fate Mapping; VZ: ventricular zone; PC: Purkinje cell; IGL: internal granule  
60 cell layer; HH: Hedgehog; *Ihh*: Indian hedgehog; *Dhh*: Desert hedgehog; PTCH1:  
61 Patched1; SMO: Smoothed; Ci: cubitus interruptus; A: Activator; R: Repressor; CKO:  
62 conditional knockout; P: Postnatal day; Tm: Tamoxifen; IHC: immunohistochemistry;  
63 GFP: Green Fluorescent Protein; het: Heterozygous; TUNEL: Terminal deoxynucleotidyl  
64 transferase dUTP nick end labeling; PCL: Purkinje cell layer; ISH: *in situ* hybridization;  
65 WT: Wild type; TDTom: Tandem Dimeric derivative of DsRed; ML: Molecular layer.

66

## 67 **Background**

68 The cerebellum (CB) consists of 80% of the neurons in the human brain (1) (60% in  
69 mouse (2)), and is involved in balance and motor coordination, but also modulates  
70 language, reasoning and social processes via its connections throughout the forebrain (3-  
71 7). The CB undergoes its major growth in the third trimester and infant stage in humans,  
72 and the first 2 weeks after birth in mice, primarily due to expansion of the granule cell  
73 precursor (GCP) pool in the external granule cell layer (EGL) (8-10). Given the late  
74 development of the CB compared to other brain regions, the CB is particularly sensitive  
75 to environmental and clinical factors that impact on growth (or cause injury) around birth.  
76 Furthermore, CB hypoplasia and prenatal injury is the second leading factor associated  
77 with autism (11). It is therefore important to identify genes that regulate cerebellum  
78 development. Many of the genes have been identified based on motor defects in  
79 homozygous null mutant mice, or in conditional mutants that remove genes in specific  
80 cell lineages. Intrinsic growth compensation mechanisms involving lineages where the  
81 gene does not function could however, obscure the normal function of a gene in  
82 cerebellar growth.

83 The CB develops from two germinal zones. The ventricular zone (VZ) gives rise to all  
84 the inhibitory neurons, including Purkinje cells (PCs) (12) as well as Nestin-expressing  
85 progenitors (NEPs) that expand in the cerebellar cortex after birth to produce astrocytes,  
86 including specialized Bergmann glia, and late born interneurons of the molecular layer  
87 (13, 14). *Ptfla*<sup>Cre</sup> mice have been used to delete genes in inhibitory neurons and some  
88 glia (15). Excitatory neurons including granule cells (GCs) originate from the upper  
89 rhombic lip (16-18). In mice, the EGL is established between embryonic day (E) 13.5 and



90 E15.5. *Atoh1*-expressing GCPs then proliferate and expand in the EGL until ~postnatal  
91 day (P) 15 in response to Sonic Hedgehog (SHH) secreted by PCs (19-21). When GCPs  
92 become postmitotic, they migrate down Bergmann glial fibers to form the internal  
93 granule cell layer (IGL). Interestingly, in rodent models the developing CB has been  
94 found to have a remarkable ability to recover from some injuries (22-24). Indeed, we  
95 recently found that proliferating cerebellar GCPs can be replaced via adaptive  
96 reprogramming of NEPs after an acute depletion of the perinatal EGL due to irradiation  
97 (25-27). Thus, NEPs in the neonatal CB have highly plastic behaviors. However, whether  
98 NEPs are harnessed to replenish cells lost in developmental mutants that lack key factors  
99 required for expansion and survival of GCPs has not been addressed.

100 One of the major pathways driving CB development is HH signaling. There are three  
101 hedgehog (*Hh*) genes in mammals, *Indian (Ihh)*, *Desert (Dhh)* and *Shh* (28, 29). *Shh*, the  
102 most widely expressed *Hh* gene, is required for development of most organs (29) by  
103 regulating a variety of cell behaviors including cell death, proliferation, specification and  
104 axon guidance. The cellular context (i.e. tissue, developmental stage, convergence of  
105 other signaling pathways) and concentration of SHH are thought to determine the  
106 particular response of a cell to SHH. HH signal transduction is mediated by the receptors  
107 Patched1 (PTCH1) and Smoothed (SMO) (28-30). In the absence of HH signaling,  
108 PTCH1 constitutively represses SMO activity, whereas HH binding relieves this  
109 inhibition, in part by allowing accumulation of SMO in cilia (31). The GLI/Ci  
110 transcription factors are the effectors of the HH pathway. In mammals, the transcriptional  
111 activator (A) and repressor (R) functions of the GLIs have been divided between the three  
112 proteins (32). A general rule is that high levels of HH signaling induce the formation of a

113 GLI2 activator (GLI2<sup>A</sup>) and this leads to transcription and translation of an addition  
114 activator, GLI1<sup>A</sup>, while a reduction or absence of the ligand allows for the formation of a  
115 GLI3 repressor (GLI3<sup>R</sup>). Importantly, we demonstrated that *Gli1* expression is dependent  
116 on GLI2/3<sup>A</sup>, and thus is only expressed in cells receiving a high level of HH signaling (33,  
117 34). The three *Gli* genes, *Shh*, *Smo*, *Ptch1* and *Ptch2* are expressed in the CB and all but  
118 *Ptch2* are required for CB development (20, 21, 35-37). In particular, we have shown that  
119 SHH functions by inducing GLI1<sup>A</sup>/2<sup>A</sup> and is required for expansion of GCPs, primarily  
120 after birth (20, 38), whereas Gli3 is not required in the cerebellum after E12.5 (36). In  
121 addition to the crucial role of SHH in generating the pool of GCs, expansion of NEPs and  
122 thus production of NEP-derived interneurons and astroglia (astrocytes and Bergmann  
123 glia) also require SHH-signaling (13, 25, 39). Furthermore, HH-signaling in NEPs is  
124 crucial for expansion of NEPs, recovery of the EGL and scaling of interneuron numbers  
125 after injury to the EGL (25).

126 Here we report that deletion of *Gli2* in the vast majority of the GCPs is not sufficient to  
127 induce major cerebellar hypoplasia. Using our MASTR technique (40) in a mosaic  
128 mutant analysis of the effect of deleting *Gli2* in scattered GCPs, we found that HH/GLI2-  
129 signaling is indeed necessary to maintain GCPs in an undifferentiated and proliferative  
130 state and to promote their survival. However, and similar to when the EGL is depleted  
131 using irradiation, we uncovered that NEPs are harnessed to repopulate the EGL and then  
132 wild type progenitors differentiate into GCs when *Gli2* is deleted in most GCPs using an  
133 *Atoh1*-driven constitutive Cre (41). Our results not only provide more evidence for the  
134 unusual ability of the CB to recover from perinatal stress, but also reveal that NEP-

135 dependent compensation should be taken into account when studying genes implicated in  
136 GCP development and when using the *Atoh1-Cre* transgene.

137

## 138 **Methods**

### 139 **Animals**

140 The following mouse lines were used: *Gli2<sup>fllox/fllox</sup>* (20), *Atoh1-Cre* (41), *Atoh-FlpoER*,  
141 *Nestin-FlpoER* (a transgene similar to that described in (40)) and *Rosa26<sup>MASTR(frt-STOP-frt-</sup>*  
142 *GFP<sup>cre</sup>)* (40), *Atoh1-GFP* (42), *Nes-CFP* (43), *Rosa26<sup>FRT-STOP-FRT-TDTom</sup>* (Jackson  
143 *Laboratory, 021875*). The *Atoh-FlpoER* line, was made using the FLPoER1 cDNA  
144 described in (40) by subcloning it into the *Atoh1* expression construct described in (17).  
145 All mouse lines were maintained on an outbred Swiss Webster background and both  
146 sexes were used for the analysis. Animals were housed on a 12 h light/dark cycle and  
147 were given access to food and water *ad libitum*. All experiments were performed using  
148 mice ages P0–P30.

149 Tamoxifen (Tm, Sigma-Aldrich) was dissolved in corn oil (Sigma-Aldrich) at 20mg/ml.  
150 P2 *Atoh1-FlpoER/+; R26<sup>MASTR/+</sup>; Gli2<sup>fllox/fllox</sup>*, *Atoh1-FlpoER/+; R26<sup>MASTR/+</sup>; Gli2<sup>fllox/fllox</sup>* and  
151 P0 *Nes-FlpoER/+; R26<sup>FSF-TDTom/+</sup>*, *Nes-FlpoER/+; R26<sup>FSF-TDTom/+</sup>; Atoh-GFP/+* mice as  
152 well as *Nestin-FlpoER/+; R26<sup>MASTR/+</sup>; Gli2<sup>fllox/fllox</sup>*, *Atoh1-Cre/+; Gli2<sup>fllox/fllox</sup>* and *Nestin-*  
153 *FlpoER; R26<sup>MASTR/+</sup>; Atoh1-Cre/+; Gli2<sup>fllox/fllox</sup>* mice and littermate controls received one  
154 200µg/g dose of Tm via subcutaneous injection.

155 50 µg/g 5-ethynyl-2\_-deoxyuridine (EdU; Invitrogen) was administered via  
156 intraperitoneal injection (10mg/ml in sterile saline) one hour before the animals were  
157 sacrificed.

158 **Tissue Processing, immunohistochemistry (IHC) and transcript detection**

159 For animals younger than P4, they were anaesthetized by cooling and brains were  
160 dissected out and fixed in 4% paraformaldehyde overnight at 4°C. Animals P4-30  
161 received 50 µl intraperitoneal injections of ketamine and received ice-cold PBS via  
162 transcardial perfusion followed by 4% paraformaldehyde. Brains were collected and  
163 submersion fixed in 4% paraformaldehyde overnight at 4°C. Tissues were processed for  
164 frozen embedding in optimal cutting temperature (OCT) compound and sectioned in the  
165 parasagittal plane on a Leica cryostat at 12 µm. For IHC, sections were incubated  
166 overnight at 4°C with the following primary antibodies: rabbit anti-Ki67 (Thermo  
167 Scientific, RM-9106-S0), mouse anti-P27 (BD Pharmigen, 610241), rabbit anti-PAX6  
168 (Millipore, AB2237), goat anti-GLI2 (R&D System, AF3635), Goat anti-SOX2 (R&D  
169 System, AF2018), rabbit anti-GFP (Life Technologies, A11122), rat anti-GFP (Nacalai  
170 Tesque, 04404-84), mouse anti-NeuN (Millipore, MAB377) diluted in PBS with 5% BSA  
171 (Sigma-Aldrich) and 0.3% Triton X-100 (Fisher Scientific). Sections were then exposed  
172 for 2h at room temperature to secondary species-specific antibodies conjugated with the  
173 appropriate Alexa Fluor (1:500; Invitrogen). EdU was detected using a commercial kit  
174 (Life Technologies) after the IHC reactions. TUNEL staining and *in situ* hybridization  
175 were performed according to standard protocols. *Cre* and *Gli1* cDNAs were used as the  
176 template for synthesizing digoxigenin-labeled riboprobes. Images were collected on a  
177 DM6000 Leica microscope and processed using Photoshop software.

178 **Live imaging**

179 *Ex vivo* cerebellar slice culture was done as previously described (25). Briefly, P8  
180 cerebella were embedded in 2.5% low-melting point agarose and saggittally sliced at

181 250 $\mu$ M on a Vibratome. Slices were immediately taken to either a Leica TCS SP8 or SP5  
182 confocal microscope platform. Slices were maintained in Eagle's Basal Medium with  
183 2mM L-glutamine, 0.5% glucose, 50U/ml Penicillin-streptomycin, 1xB27 and 1xN2  
184 supplements at 37°C and 5% CO<sub>2</sub>. Image stacks were acquired every 5min for ~4h. Cell  
185 tracking was performed using Imaris software. The autoregressive tracking function was  
186 employed with a spot size of 6 $\mu$ M and a step size of 7 $\mu$ M. Manual correction was  
187 performed.

### 188 **Quantifications and Statistical Analyses**

189 ImageJ software was used to measure the area (mm<sup>2</sup>) of cerebellar sections near the  
190 midline. For all IHC staining, cell counts were obtained using ImageJ and Neurolucida  
191 Software. For each developmental stage, three sections were analyzed per animal and  $\geq 3$   
192 animals. Statistical analyses were performed using Prism software (GraphPad) and  
193 significance was determined at  $P < 0.05$ . All statistical analyses were two-tailed. For two-  
194 group comparisons with equal variance as determined by the  $F$ -test, an unpaired Student's  
195  $t$  test was used. Welch's correction was used for unpaired  $t$ -tests of normally distributed  
196 data with unequal variance. P values are indicated in the figures. No statistical methods  
197 were used to predetermine the sample size, but our sample sizes are similar to those  
198 generally employed in the field. No randomization was used. Data collection and analysis  
199 were not performed blind to the conditions of the experiments.

200

### 201 **Results**

202

203 **Mosaic analysis reveals SHH-GLI2 signaling is critical for maintaining GCPs in an**  
204 **undifferentiated proliferative state and promoting their survival**

205 Our previous studies demonstrated that loss of the majority of HH-signaling in the entire  
206 CB at mid-gestation (*Nes-Gli2* conditional knockout or CKO - *Nestin-Cre; Gli2<sup>fllox/fllox</sup>*  
207 mice) results in an almost complete lack of GCPs at birth and a very diminished CB in  
208 adults (20). Since HH-signaling is required after birth in NEPs for their expansion and  
209 production of late born interneurons and astrocytes in the CB (13), it is possible that part  
210 of the phenotype observed in *Nes-Gli2* CKOs was due to loss of HH-signaling in Non-  
211 GCP cells. We therefore took two approaches to test the cell autonomous requirement for  
212 HH signaling in GCPs. First we used the *R26<sup>FSF-GFPcre</sup>* MASTR allele (*R26<sup>MASTR</sup>*) (40) and  
213 a *Atoh1-FlpoER* transgene to knock out *Gli2* in scattered GCPs at ~P3 by administering  
214 Tamoxifen (Tm) at P2 and analyzed the percentage of undifferentiated GFP+ GCPs  
215 (GFP+ cells in the proliferating outer EGL/total GFP+ cells – proliferating and post  
216 mitotic) at both P4 and P8 (Fig. 1a-c). We did indeed observe a significant decrease in the  
217 percentage of GFP+ cells that were GCPs in the medial CB (vermis) of P8 *Atoh1-M-Gli2*  
218 CKOs (*R26<sup>MASTR/+</sup>; Atoh1-FlpoER/+; Gli2<sup>fllox/fllox</sup>* mice; n=3;) compared to *Atoh1-M-Gli2*  
219 heterozygous (het) controls (*R26<sup>MASTR/+</sup>; Atoh1-FlpoER/+; Gli2<sup>fllox/+</sup>* mice; n=3) (29.79%  
220 compared to 67.09%) (Fig.1d). Using a 1hr pulse of EdU, we found that the proliferation  
221 index (#EdU+ GFP+ cells in the outer EGL/total GFP+ cells in the outer EGL) of *Atoh1-*  
222 *M-Gli2* CKO GCPs was significantly decreased compared to controls (n=3; 14.39%  
223 compared to 29.06%) (Fig.1e). At P4 however, there was no significant difference in the  
224 percentage of undifferentiated GFP+ GCPs between *Atoh1-M-Gli2* CKOs and controls  
225 (p=0.162) (Fig.1d). Although not significant, we observed a trend towards a decrease in

226 the proliferation index in P4 *Atoh1-M-Gli2* CKO cerebella (CKO vs control,  $p=0.162$ )  
227 (Fig.1e). Interestingly, at P4, only 2 days after Tm injection, the number of GFP+ cells in  
228 the oEGL already appeared decreased in mutants compared to controls (CKO vs control,  
229  $p=0.081$ ) (Fig.S1a) suggesting that some of the cells underwent cell death. Consistent  
230 with this idea, TUNEL staining revealed a significant increase in cell death in the entire  
231 EGL at P4 ( $69.44\pm 7.76$ /section in mutants vs  $37.67\pm 5.1$  in controls,  $p=0.027$ ). We  
232 performed the same analysis in the lateral CB (hemispheres) and found a similar outcome  
233 (Fig.S1b-d). These results reveal that HH-signaling through GLI2 plays an important role  
234 in maintaining GCPs in an undifferentiated state, and also promotes their proliferation  
235 and survival.

236 As an alternative approach to a mosaic mutant analysis, we deleted *Gli2* in the vast  
237 majority of GCPs (*Atoh1-Cre/+; Gli2<sup>lox/lox</sup>* or *Atoh1-Gli2* CKOs). Consistent with  
238 previous studies using whole cerebellum *Cre* transgenes and our mosaic analysis, at P0  
239 the anterior vermis of *Atoh1-Gli2* CKOs ( $n=5$ ) was consistently smaller than controls  
240 (*Gli2<sup>lox/lox</sup>*) and the EGL was greatly diminished (Fig. 1g-j). SHH-GLI2 signaling loss  
241 was confirmed by the lack of *Gli1* expression in the EGL of *Atoh1-Gli2* CKO cerebella  
242 (Fig.1G-H). Moreover, proliferation (Ki67) and differentiation (P27) were disrupted in  
243 the mutant EGL since two distinct EGL layers were not present (Fig. 1i-j). Interestingly,  
244 we observed an apparent increase of *Gli1* expression in the Purkinje cell layer (PCL)  
245 suggesting that deletion of *Gli2* in the EGL induced a cell non-autonomous up-regulation  
246 of HH-signaling in the Bergmann glia in the PCL (star in Fig.1g-h). The lack of a  
247 phenotype in the posterior vermis is likely explained by low expression of *Cre* (44) in  
248 this region and thus low recombination (45) (Fig.S2).

249 All together, these results confirm a major role played by SHH-signaling through GLI2 to  
250 promote the expansion of the EGL and thus ensure the generation of the correct number  
251 of GCs.

252

### 253 **The size of the *Atoh1-Gli2* CKO cerebellum progressively recovers after birth**

254 We have recently shown that the size of the CB can recover to ~80% its normal size after  
255 postnatal injury (irradiation) to the EGL (25). To test whether genetic ablation of *Gli2* in  
256 the EGL can trigger a similar recovery mechanism, we analyzed the phenotype of adult  
257 (P30) *Atoh1-Gli2* CKO cerebella. The area of mid-sagittal sections of P30 animals was  
258 quantified, and revealed only a  $21.7 \pm 12.0\%$  reduction (n=6) in *Atoh-Gli2* CKOs  
259 compared to littermate controls (Fig. 2a-d). Interestingly, we observed a large variability  
260 in the phenotype, with some mutant cerebella recovering better than others and some  
261 mice had a cytoarchitecture that was very similar to controls (compare Fig.2b and c). We  
262 then measured the area of midsagittal cerebellar sections from P4, P8 and P12 mice to  
263 determine how recovery occurred in some mice (Fig. 2e-j). As predicted, the size of  
264 *Atoh1-Gli2* CKOs cerebella was greatly reduced at P4 compared to control animals (57%  
265 the size of control CB) (Fig. 2k-l) and then partially recovered. Since our mosaic mutant  
266 results showed a similar behavior of *Gli2* CKO GCPs in the hemispheres and vermis, we  
267 analyzed the phenotype of *Atoh1-Gli2* CKOs in the hemisphere. Curiously, unlike the  
268 vermis we did not observe a significant decrease in the size of the mutant hemispheres at  
269 P30 compared to controls (p=0.152) (Fig.S3a-c). Analysis of hemispheric sagittal  
270 sections from P4 (n=3), P8 (n=3) and P12 (n=3) animals revealed the hemispheres were  
271 greatly diminished at P4 and then progressively recovered both their size and



272 cytoarchitecture (Fig.S3d-i). Interestingly, whereas the vermis of *Atoh1-Gli2* CKOs mice  
273 at P8 showed a clear hypoplasia phenotype, the hemispheres exhibited extra folia (arrow  
274 in FigS3), suggesting different compensation responses in the two locations of the CB in  
275 *Atoh1-Gli2* CKOs.

276 In summary, we found that depletion of the EGL at P0 by removing *Gli2* from embryonic  
277 GCPs is not sufficient to induce consistent hypoplasia of the vermis at P30. This raised  
278 the possibility of a compensation mechanism that ensures the global recovery of the  
279 developing CB after genetic injury.

280

### 281 **Wild type cells replenish the anterior EGL of *Atoh1-Gli2* CKOs**

282 Since the final size of the CB is largely dependent on the expansion of the EGL, we  
283 analyzed *Atoh1-Gli2* CKO cerebella at P8 when the EGL is normally thick. Similar to our  
284 previous study using irradiation at P1 (25), the EGL was replenished with proliferating  
285 cells by P8 in *Atoh1-Gli2* CKO animals. We therefore performed *in situ* hybridization  
286 (ISH) and analyzed the expression of *Gli1*. Although *Gli1* expression was greatly  
287 diminished at P0 (Fig.1h), the EGL of P8 *Atoh1-Gli2* CKOs exhibited *Gli1* expression  
288 throughout the anterior EGL, comparable to that observed in control animals and the  
289 posterior EGL of mutants (Fig. 3a-b). In addition and unlike at P0, no difference in *Gli1*  
290 expression was observed in the PCL at P8 (Fig. 3a-b). Moreover, *Gli1*<sup>+</sup> cells expanded in  
291 the EGL, as revealed by the proliferation marker Ki67, and increased the size of the EGL  
292 by seemingly delaying their differentiation compared to controls since the proliferative  
293 (Ki67<sup>+</sup>) outer EGL [oEGL] was thicker and the inner EGL [iEGL] thinner compared to  
294 controls (n=8) (Fig. 2c-d). Interestingly, GCPs in the partially rescued anterior EGL

295 expressed a low level of the stem cell marker SOX2 at P8, something that was never  
296 observed in control animals (Fig. 2e-f). Furthermore, although the GCPs in the EGL of  
297 *Atoh1-Gli2* CKOs expressed the EGL marker *Atoh1* (as shown by Atoh-GFP staining,  
298 Fig S4a-b), only a small subset of cells in the anterior EGL expressed *Cre* in the anterior  
299 CB compared to controls (*Atoh1-Cre/+*; *Gli2<sup>fllox/+</sup>* or *Atoh1-Gli2* het) (Fig. 3g-h and Fig.  
300 S4a-b). Consistent with the presence of wild type (WT) cells in the EGL, GLI2 protein was  
301 detected in the vast majority of cells in the EGL (inset Fig. 3h). Interestingly, TUNEL  
302 analysis showed an apparent increase of cell death in the replenished P8 EGL compared  
303 to controls (Fig. 4 c-d). One interpretation of these results is that WT cells replenish the  
304 EGL and then only a small subset of the cells are able to turn on *Cre* expression, and those  
305 that do express *Cre* and delete *Gli2* undergo cell death (Fig. S4c-d). Thus, the reduction  
306 of GCPs in the EGL of *Atoh1-Gli2* CKOs at P0 stimulates a compensation process that  
307 leads to replenishment of the GCPs.

308

### 309 **NEPs switch their fate to become GCPs and produce GCs in *Atoh1-Gli2* CKO** 310 **cerebella**

311 Our previous study demonstrated that SOX2<sup>+</sup> NEPs can replenish the EGL after injury  
312 (25), and our present results revealed that the rescued EGL in P8 *Atoh1-Gli2* CKO  
313 cerebella expresses a low level of SOX2. We thus hypothesized that WT NEPs are able to  
314 change their fate to become GCPs and replenish the EGL as part of a compensation  
315 mechanism. Using a *Nestin-FlpoER* transgene (40) and a Flippase (Flp)-dependent *R26*  
316 reporter allele that expresses TDTom, we performed genetic inducible fate mapping  
317 (GIFM) of NEPs in the *Atoh1-Gli2* CKO cerebella. In contrast to P30 controls (*Nestin-*

318 *FlpoER/+; R26<sup>flr-STOP-flr-TDTom/+</sup>* or *Nes-TDTom* mice administrated Tm at P0), *Atoh1-Gli2*  
319 CKO mutants (n=6) had an extensive contribution of TDTom+ cells to the NeuN+ GC  
320 population in the IGL (Fig. 4a-f). Interestingly, the degree of recovery of the vermis in  
321 P30 *Atoh1-Gli2* CKO cerebella correlated with the contribution of NEP-derived TDTom+  
322 cells in the IGL (compare Fig. 4c-d to 4e-f). Similar results were obtained when  
323 analyzing the hemispheres (Fig. S5). However, and consistent with our analysis of CB  
324 size, there appeared to be less variability in the percentage of TDTom+ cells observed in  
325 the hemispheres compared to the vermis. Analysis of the vermis at P8 showed an increase  
326 in the number of *Nestin*-derived TdTom+ cells in the EGL compared to controls (Fig. 4g-  
327 h). Furthermore, TDTom+ cells in the P8 EGL already expressed the GCP marker *Atoh1*  
328 (as shown by *Atoh1*-GFP staining) (Fig 4g-h).

329 Taken together, our findings indicate that in *Atoh1-Gli2* CKOs in which the EGL is  
330 depleted at P0 NEPs repopulate the EGL, turn on EGL genes (*Atoh1*) and down-regulate  
331 NEP genes (*SOX2*) and then differentiate into GCs that populate the IGL.

332

### 333 **A subset of proliferating PCL NEP-derived cells migrate to the IGL in *Atoh1-Gli2*** 334 **CKO cerebella**

335 We next analyzed the behavior of NEPs using a *Nes-CFP* reporter line (43). Consistent  
336 with our GIFM experiment and unlike control animals (*Nes-CFP*), the EGL of *Atoh1-*  
337 *Gli2* CKOs expressed a high level of CFP (Fig. 5a-b). Surprisingly, streams of CFP+  
338 cells were seen in lobule 3 spanning between the IGL and EGL that were not present in  
339 controls (Fig. 5a-b) or in irradiated mice (25). Interestingly, some cells in the streams  
340 expressed the proliferation maker *Ki67* as well as the GCP/GC marker *PAX6* (Fig. 5c-d)

341 suggesting that a subset of NEP-derived cells were not able to stay in the EGL and thus  
342 migrated back to the cerebellar cortex. To test this idea we performed live imaging of P8  
343 *Nes-CFP* cerebellar slice cultures from both control and *Atoh1-Gli2* CKOs (*Atoh-Gli2*  
344 CKO; *Nes-CFP*). Strikingly, by tracking the movement of individual cells during ~6hrs  
345 of imaging we observed Nes-CFP+ cells actively migrating from the PCL to the EGL in  
346 slices from *Atoh-Gli2* CKO cerebella but not control mice at P8 (Fig. 5e-f and sup. videos  
347 1-2). The CFP+ layer of cells also appeared thicker in the mutants, indicating the NEPs  
348 expanded in number. Interestingly, in the areas containing streams of CFP+ cells the  
349 majority of cells that were tracked moved in the opposite direction from the EGL to the  
350 IGL (Fig. 5g and sup. video 3). Our live imaging experiments thus provide evidence that  
351 NEPs located in the PCL expand and then migrate to replenish the EGL in response to  
352 GCP-specific loss of *Gli2*. Furthermore, a subset of NEP-derived cells is not able to  
353 integrate into the EGL and migrate back down to towards the cerebellar cortex.

#### 354 ***Gli2* CKO in NEPs inhibits the recovery of the EGL in *Atoh1-Gli2* CKOs**

355 Since we have shown previously that SHH signaling (*Smo*) is necessary in NEPs for CB  
356 recovery following irradiation, we tested whether *Gli2* plays a role in this process. We  
357 generated littermates of 4 different genotypes that were administered Tm at P0, and  
358 analyzed each genotype (n=3) at P8, P12 and P21: *Gli2<sup>lox/lox</sup>* WT (control) mice, *Nestin-*  
359 *FlpoER/+; R26<sup>MASTR/+</sup>; Gli2<sup>lox/lox</sup>* single (*Nes-Gli2* CKOs mutants lacking *Gli2* in NEPs),  
360 *Atoh1-Cre/+; Gli2<sup>lox/lox</sup>* single (*Atoh1-Gli2* CKOs lacking *Gli2* in anterior GCPs) and  
361 *Nestin-FlpoER/+; R26<sup>MASTR/+</sup>; Atoh1-Cre/+; Gli2<sup>lox/lox</sup>* double (*Atoh1-Nes-Gli2* CKOs  
362 lacking *Gli2* in NEPs and GCPs) mutants. We did not observe any obvious phenotype in  
363 the *Nes-Gli2* CKOs at all stages compared to controls (compare Fig. 6c-d to a-b, Fig.

364 S6c-d to a-b and Fig. S7d to a). However, H&E staining revealed that the anterior CB  
365 was greatly reduced in the double mutants (*Atoh1-Nes-Gli2* CKOs) compared to *Atoh1-*  
366 *Gli2* CKOs at both P8 and P12 (compare Fig. 6e to g and Fig. S6e to g). Analysis of  
367 proliferation (Ki67) and differentiation (P27) markers at both stages showed not only that  
368 the anterior EGL was greatly depleted in *Atoh1-Nes-Gli2* CKO compared to *Atoh1-Gli2*  
369 CKO cerebella, but also that *Atoh1-Nes-Gli2* CKO animals failed to form a proper P27+  
370 inner EGL and IGL (compare Fig. 6f to h and Fig. S6f to h). Analysis of the fate of  
371 GFP+ *Nestin*-expressing cells in P21 *Atoh1-Nes-Gli2* CKOs using a Flp-mediated *R26*  
372 reporter allele that expresses  $\beta$ Galactosidase (*Bgal*)(*R26<sup>flrt-STOP-flrt-lacZ/+</sup>*) revealed that  
373 unlike *Atoh1-Gli2* CKOs in which *Nestin*-derived GCs populated the IGL ((Fig. 4a-f and  
374 Fig. S7c), the *Gli2* mutant *Nestin*-derived cells did not populate the IGL (Fig. S7f). The  
375 few GFP+ cells in the IGL of the double mutants were likely interneurons or astrocytes.  
376 These results demonstrate that SHH-signaling through GLI2 plays a crucial role during  
377 NEP-mediated cerebellar recovery from loss of GCPs.

378

## 379 **Discussion**

380 In this study we developed a conditional mutant strategy to delete *Gli2* (the gene  
381 encoding the major effector of SHH signaling) in the vast majority of GCPs using a  
382 *Atoh1-Cre* transgene that is first expressed in embryonic GCPs (45). Although we show  
383 that SHH-GLI2 signaling is crucial for generating the correct pool of GCs, deletion of  
384 *Gli2* in the EGL using this transgene is not sufficient to induce a major hypoplasia of the  
385 adult CB. We discovered that although as expected the GCP pool was greatly diminished  
386 at birth, it was subsequently replenished due to adaptive reprogramming of WT NEPs,

387 and since the transgene did not turn on in many of the newly generated GCPs, the EGL  
388 recovered and generated GCs.

389 SHH regulates a variety of cell behaviors depending on the cellular context and  
390 concentration of SHH ligand (29). We demonstrated that SHH signaling through the  
391 GLI2 activator not only influences proliferation of GCPs by keeping them in an  
392 undifferentiated state and increasing their proliferation rate, but also maintains their  
393 survival. Our previous study showed that massive killing of GCPs at an early stage of  
394 postnatal development (P2-3) triggers NEP-dependent recovery of the EGL (25). It is  
395 therefore possible that cell death is involved in triggering NEPs to change their fate and  
396 generate GCPs, possibly because an alarm signal is released. An alternative mechanism  
397 for the stimulation of NEPs is that PCs are able to sense the EGL injury because of a lack  
398 of excitatory inputs from parallel fibers of GCs, and as part of the response PCs modulate  
399 the amount of HH signaling in the PCL NEPS by concentrating the ligand at their surface  
400 (25). Cell death in the EGL *per se* would therefore not be the main trigger that recruits  
401 NEPs to the EGL but instead the lack of differentiation of GCPs would stimulate NEPs.

402 Consistent with a role for GCs in regulating NEP behaviors, the *Atoh1-Cre* transgene is  
403 first expressed in GCPs at E13.5 (17), but the replenishment of the EGL in *Atoh1-Gli2*  
404 CKOs only occurs several days after the EGL is depleted and when the layer of  
405 differentiating GCs in the EGL and IGL of control animals first becomes apparent (P3-  
406 P4). Thus, the possible involvement of NEPs in compensation processes should be  
407 consider when analyzing the phenotype of conditional mutants that affect not only trophic  
408 factors that stimulate GCP proliferation and survival, but also genes involved in  
409 differentiation and migration of GCPs.

410 Our study clearly demonstrates that depletion of GLI2 in the EGL using an *Atoh1-Cre*  
411 transgene is not sufficient to drastically and consistently reduce the size of the adult CB.  
412 Curiously, *Atoh1-CreER/+; Smo<sup>loxP/Δ</sup>* mice in which one allele of the *Smoothed* gene  
413 was deleted in the germline and the deletion was dependent on tamoxifen (Tm) inducible  
414 Cre (*Atoh1-CreER*) showed a severe CB hypoplasia (13). A possible explanation for the  
415 different phenotype from *Atoh1-Gli2* CKOs lies in our finding that HH signaling is  
416 crucial for the expansion of PCL NEPs and their migration to the EGL for effective  
417 recovery (25). In addition, we found that Tm diminishes CB recovery by delaying the  
418 response of NEPs after injury. Thus the combination of a lower level of SMO protein in  
419 NEPs as well as administration of Tm to *Atoh1-CreER/+; Smo<sup>loxP/Δ</sup>* mice might have  
420 blunted the response of NEPs to *Smo*-dependent depletion of the EGL, resulting in little  
421 compensation and a large decrease in size of the CB compared to controls.  
422 We have uncovered that adaptive reprogramming of NEPs occurs in *Atoh1-Gli2* CKO  
423 animals. However, we observed a large variability in the adult CB phenotype, especially  
424 in the vermis, suggesting that some cerebella are not able to efficiently recover after *Gli2*  
425 depletion in the EGL. Although ATOH1+ WT cells replenish the EGL over time in  
426 *Atoh1-Gli2* CKOs, we found that only a variable subset of GCPs turned on the *Atoh1-Cre*  
427 transgene in different mice. Consistent with *Atoh1-Cre* deleting *Gli2* in a subset of NEP-  
428 derived GCPs, we observed an increase in TUNEL staining in the EGL of P8 *Atoh1-Gli2*  
429 CKO cerebella. It is likely that the increase in cell death negatively impacts on the  
430 expansion of new GCPs in the EGL. In addition, our live imaging experiment revealed  
431 that proliferative Nes-CFP+ and PAX6+ cells migrated from the EGL to the cerebellar  
432 cortex. We hypothesize that a factor is missing in NEP-derived GCPs that lose GLI2 after

433 entering the EGL that is needed to maintain them in the EGL. An interesting candidate  
434 signaling pathway is SDF1-CXCR4 signaling, since *Sdf1* (*Cxcl12*), the gene encoding a  
435 well-known chemo-attractant, is specifically expressed in the meninges covering the CB  
436 (46) and two receptors, CXCR4 and CXCR7, are expressed in GCPs and the PCL,  
437 respectively (47, 48). Furthermore, SDF1 is required to maintain GCPs in the outer EGL  
438 and to make them more permissive to SHH-dependent proliferation by inhibiting cAMP  
439 or PKA activity (46). Furthermore, SHH signaling induces the transcription of *Cxcr4* and  
440 *Cxcr7*, which contain GLI binding sites in their promoters (49). We propose that in  
441 *Atoh1-Gli2* CKOs a subset of PCL NEPs are able to express CRE protein after integrating  
442 in the EGL, and the subsequent deletion of GLI2 protein reduces the expression of  
443 CXCR4, leading to migration of proliferating NEP-derive GCP-like cells back into the  
444 cerebellar cortex. Together, the increase of cell death in the EGL and the premature  
445 migration of proliferating NEP-derived GCPs could explain the variable recovery of the  
446 CB in *Atoh1-Gli2* CKOs.

447 The cerebellum is broadly divided along the medio-lateral axis into a central vermis and  
448 two lateral hemispheres (19). Although recovery from depletion of the EGL at P0  
449 occurred in both regions, the compensation was more variable and less pronounced in the  
450 vermis compared to the hemispheres, with no statistical difference in hemispheric size  
451 compared to controls. Moreover the hemispheres of *Atoh1-Gli2* CKOs exhibited extra  
452 folia at P8 (arrow in FigS3), highlighting a differential recovery response along the  
453 medio-lateral axis. The vermis and hemispheres are molecularly distinct on the basis of  
454 gene expression patterns and functionally distinct based on afferent circuits (19, 50).  
455 Moreover we recently reported that hemispheric GCPs have a higher sensitivity to high



456 level SHH-signaling than those in the vermis, and this likely contributes to the high  
457 incidence of medulloblastoma tumors in the hemispheres (50). Furthermore, since SHH  
458 signaling is required for recovery of the EGL after injury by stimulating the expansion of  
459 PCL NEPs and their migration towards the EGL (25), we propose that hemispheric NEP-  
460 derived GCPs in the EGL maintain a higher level of SHH signaling and therefore expand  
461 more rapidly and efficiently than those in the vermis.

462

### 463 **Conclusion**

464 In this study we uncovered that the plasticity of cerebellar NEPs and their ability to  
465 repopulate GCPs after post-natal cerebellar loss of the EGL can occur in conditional  
466 mouse mutants. A mild phenotype in EGL-specific conditional mutants therefore does  
467 not necessarily mean a gene does not play a major role in development of the GC-lineage.  
468 Thus, the possible contribution of adaptive reprogramming of WT NEPs in a recovery  
469 process must be considered when analyzing and interpreting cerebellar phenotypes. This  
470 is particularly the case if the *Atoh1-Cre* transgene, which is broadly used in the CB  
471 field, is used to generate conditional mutants. Our findings also raise the question of  
472 whether similar recovery phenomena occur in other regions of the brain, and  
473 depending on the transgene used could complicate interpretation of mutant phenotypes.

474

### 475 **Acknowledgments**

476 We thank the past and present members of the laboratory for helpful discussions during  
477 the course of our study.

478

479 **Funding**

480 This work was supported by grants from the Brain Tumor Center at MSKCC and from  
481 the Philippe Foundation (to A.W), and from the NIH (R37-MH085726 and R01  
482 NS092096 to A.L.J and F32 NS086163 to A.K.L.) and a National Cancer Institute Cancer  
483 Center Support Grant (P30 CA008748-48 to A.L.J).

484

485 **Availability of data and materials**

486 All mouse lines are available from the Joyner lab or Jackson laboratories. All data  
487 generated or analyzed for this study are included in this published article.

488

489 **Authors' contribution**

490 A.W. and A.L.J. conceived the project; A.W., A.K.L and A.L.J. designed the research;  
491 A.W., M.M., A.K.L and D.N.S. performed the experiments; A.W., M.M., A.K.L and  
492 A.L.J. analyzed the data and all authors discussed the data; A.W. and A.L.J. wrote the  
493 manuscript with contributions from all authors.

494

495 **Competing interests**

496 The authors declare no conflict of interest.

497

498 **Consent for publication**

499 All authors read and approved the manuscript.

500

501 **Ethics approval and consent to participate**

502 All animal procedures were performed according to a protocol (07-01-001) approved by  
503 the Memorial Sloan Kettering Cancer Center's Institutional Animal Care and Use  
504 Committee.

505

506

507 **References:**

- 508 1. Azevedo FA, Carvalho LR, Grinberg LT, Farfel JM, Ferretti RE, Leite RE, et al.  
509 Equal numbers of neuronal and nonneuronal cells make the human brain an isometrically  
510 scaled-up primate brain. *J Comp Neurol.* 2009 Apr 10;513(5):532-41. PubMed PMID:  
511 19226510. Epub 2009/02/20. eng.
- 512 2. Herculano-Houzel S, Mota B, Lent R. Cellular scaling rules for rodent brains.  
513 *Proc Natl Acad Sci U S A.* 2006 Aug 8;103(32):12138-43. PubMed PMID: 16880386.  
514 Pubmed Central PMCID: PMC1567708. Epub 2006/08/02. eng.
- 515 3. Steinlin M. The cerebellum in cognitive processes: supporting studies in children.  
516 *Cerebellum.* 2007;6(3):237-41. PubMed PMID: 17786820. Epub 2007/09/06. eng.
- 517 4. Tomlinson SP, Davis NJ, Bracewell RM. Brain stimulation studies of non-motor  
518 cerebellar function: a systematic review. *Neuroscience and biobehavioral reviews.* 2013  
519 Jun;37(5):766-89. PubMed PMID: 23500608. Epub 2013/03/19. eng.
- 520 5. Ito M. Control of mental activities by internal models in the cerebellum. *Nat Rev*  
521 *Neurosci.* 2008 Apr;9(4):304-13. PubMed PMID: 18319727. Epub 2008/03/06. eng.
- 522 6. Buckner RL. The cerebellum and cognitive function: 25 years of insight from  
523 anatomy and neuroimaging. *Neuron.* 2013 Oct 30;80(3):807-15. PubMed PMID:  
524 24183029. Epub 2013/11/05. eng.
- 525 7. Strick PL, Dum RP, Fiez JA. Cerebellum and nonmotor function. *Annu Rev*  
526 *Neurosci.* 2009;32:413-34. PubMed PMID: 19555291. Epub 2009/06/27. eng.
- 527 8. Altman J, Bayer SA. Development of the cerebellar system in relation to its  
528 evolution, structure, and functions. Boca Raton: CRC Press; 1997.

- 529 9. Rakic P, Sidman RL. Histogenesis of cortical layers in human cerebellum,  
530 particularly the lamina dissecans. *J Comp Neurol.* 1970 Aug;139(4):473-500. PubMed  
531 PMID: 4195699. Epub 1970/08/01. eng.
- 532 10. Dobbing J, Sands J. Quantitative growth and development of human brain.  
533 *Archives of disease in childhood.* 1973 Oct;48(10):757-67. PubMed PMID: 4796010.  
534 Pubmed Central PMCID: PMC1648530. Epub 1973/10/01. eng.
- 535 11. Wang SS, Kloth AD, Badura A. The cerebellum, sensitive periods, and autism.  
536 *Neuron.* 2014 Aug 6;83(3):518-32. PubMed PMID: 25102558. Pubmed Central PMCID:  
537 PMC4135479. Epub 2014/08/08. eng.
- 538 12. Hoshino M, Nakamura S, Mori K, Kawauchi T, Terao M, Nishimura YV, et al.  
539 *Ptf1a*, a bHLH transcriptional gene, defines GABAergic neuronal fates in cerebellum.  
540 *Neuron.* 2005 Jul 21;47(2):201-13. PubMed PMID: 16039563. Epub 2005/07/26. eng.
- 541 13. Fleming JT, He W, Hao C, Ketova T, Pan FC, Wright CC, et al. The Purkinje  
542 neuron acts as a central regulator of spatially and functionally distinct cerebellar  
543 precursors. *Dev Cell.* 2013 Nov 11;27(3):278-92. PubMed PMID: 24229643. Pubmed  
544 Central PMCID: PMC3860749. Epub 2013/11/16. eng.
- 545 14. Parmigiani E, Leto K, Rolando C, Figueres-Onate M, Lopez-Mascaraque L,  
546 Buffo A, et al. Heterogeneity and Bipotency of Astroglial-Like Cerebellar Progenitors  
547 along the Interneuron and Glial Lineages. *J Neurosci.* 2015 May 13;35(19):7388-402.  
548 PubMed PMID: 25972168. Epub 2015/05/15. eng.
- 549 15. Kawaguchi Y, Cooper B, Gannon M, Ray M, MacDonald RJ, Wright CV. The  
550 role of the transcriptional regulator *Ptf1a* in converting intestinal to pancreatic

- 551 progenitors. *Nat Genet.* 2002 Sep;32(1):128-34. PubMed PMID: 12185368. Epub  
552 2002/08/20. eng.
- 553 16. Wingate RJ, Hatten ME. The role of the rhombic lip in avian cerebellum  
554 development. *Development.* 1999 Oct;126(20):4395-404. PubMed PMID: 10498676.  
555 Epub 1999/09/28. eng.
- 556 17. Machold R, Fishell G. Math1 is expressed in temporally discrete pools of  
557 cerebellar rhombic-lip neural progenitors. *Neuron.* 2005 Oct 6;48(1):17-24. PubMed  
558 PMID: 16202705. Epub 2005/10/06. eng.
- 559 18. Wang VY, Rose MF, Zoghbi HY. Math1 expression redefines the rhombic lip  
560 derivatives and reveals novel lineages within the brainstem and cerebellum. *Neuron.*  
561 2005 Oct 6;48(1):31-43. PubMed PMID: 16202707. Epub 2005/10/06. eng.
- 562 19. Sillitoe RV, Joyner AL. Morphology, molecular codes, and circuitry produce the  
563 three-dimensional complexity of the cerebellum. *Annu Rev Cell Dev Biol.* 2007;23:549-  
564 77. PubMed PMID: 17506688. Epub 2007/05/18. eng.
- 565 20. Corrales JD, Blaess S, Mahoney EM, Joyner AL. The level of sonic hedgehog  
566 signaling regulates the complexity of cerebellar foliation. *Development.* 2006  
567 May;133(9):1811-21. PubMed PMID: 16571625. Epub 2006/03/31. eng.
- 568 21. Lewis PM, Gritli-Linde A, Smeyne R, Kottmann A, McMahon AP. Sonic  
569 hedgehog signaling is required for expansion of granule neuron precursors and patterning  
570 of the mouse cerebellum. *Dev Biol.* 2004 Jun 15;270(2):393-410. PubMed PMID:  
571 15183722. Epub 2004/06/09. eng.

- 572 22. Bohn MC, Lauder JM. The effects of neonatal hydrocortisone on rat cerebellar  
573 development: An autoradiographic and light microscopic study. *Dev Neurosci.*  
574 1978;1:250-66.
- 575 23. Heine VM, Rowitch DH. Hedgehog signaling has a protective effect in  
576 glucocorticoid-induced mouse neonatal brain injury through an 11betaHSD2-dependent  
577 mechanism. *J Clin Invest.* 2009 Feb;119(2):267-77. PubMed PMID: 19164857. Pubmed  
578 Central PMCID: PMC2631296. Epub 2009/01/24. eng.
- 579 24. Altman J, Anderson WJ, Wright KA. Early Effects of X-Irradiation of the  
580 Cerebellum in Infant Rats: Decimation and Reconstitution of the External Granular layer.  
581 *Experimental Neurology.* 1969;24:196-216.
- 582 25. Wojcinski A, Lawton AK, Bayin NS, Lao Z, Stephen DN, Joyner AL. Cerebellar  
583 granule cell replenishment postinjury by adaptive reprogramming of Nestin(+)  
584 progenitors. *Nat Neurosci.* 2017 Oct;20(10):1361-70. PubMed PMID: 28805814.  
585 Pubmed Central PMCID: PMC5614835. Epub 2017/08/15. eng.
- 586 26. Andreotti JP, Prazeres P, Magno LAV, Romano-Silva MA, Mintz A, Birbrair A.  
587 Neurogenesis in the postnatal cerebellum after injury. *International journal of*  
588 *developmental neuroscience : the official journal of the International Society for*  
589 *Developmental Neuroscience.* 2018 Jun;67:33-6. PubMed PMID: 29555564. Epub  
590 2018/03/21. eng.
- 591 27. Jaeger BN, Jessberger S. Unexpected help to repair the cerebellum. *Nat Neurosci.*  
592 2017 Sep 26;20(10):1319-21. PubMed PMID: 28949331. Epub 2017/09/28. eng.
- 593 28. Ingham PW, McMahon AP. Hedgehog signaling in animal development:  
594 paradigms and principles. *Genes Dev.* 2001;15(23):3059-87.

- 595 29. Varjosalo M, Taipale J. Hedgehog: functions and mechanisms. *Genes Dev.* 2008  
596 Sep 15;22(18):2454-72. PubMed PMID: 18794343. Epub 2008/09/17. eng.
- 597 30. Allen MC. Neurodevelopmental outcomes of preterm infants. *Current opinion in*  
598 *neurology.* 2008 Apr;21(2):123-8. PubMed PMID: 18317268. Epub 2008/03/05. eng.
- 599 31. Goetz SC, Anderson KV. The primary cilium: a signalling centre during  
600 vertebrate development. *Nat Rev Genet.* 2010 May;11(5):331-44. PubMed PMID:  
601 20395968. Epub 2010/04/17. eng.
- 602 32. Fuccillo M, Joyner AL, Fishell G. Morphogen to mitogen: the multiple roles of  
603 hedgehog signalling in vertebrate neural development. *Nat Rev Neurosci.* 2006  
604 Oct;7(10):772-83. PubMed PMID: 16988653. Epub 2006/09/22. eng.
- 605 33. Bai CB, Auerbach W, Lee JS, Stephen D, Joyner AL. Gli2, but not Gli1, is  
606 required for initial Shh signaling and ectopic activation of the Shh pathway. *Development.*  
607 2002 Oct;129(20):4753-61. PubMed PMID: 12361967. Epub 2002/10/04. eng.
- 608 34. Bai CB, Stephen D, Joyner AL. All mouse ventral spinal cord patterning by  
609 hedgehog is Gli dependent and involves an activator function of Gli3. *Dev Cell.* 2004  
610 Jan;6(1):103-15. PubMed PMID: 14723851. Epub 2004/01/16. eng.
- 611 35. Lee Y, Miller HL, Russell HR, Boyd K, Curran T, McKinnon PJ. Patched2  
612 modulates tumorigenesis in patched1 heterozygous mice. *Cancer research.* 2006 Jul  
613 15;66(14):6964-71. PubMed PMID: 16849540. eng.
- 614 36. Blaess S, Stephen D, Joyner AL. Gli3 coordinates three-dimensional patterning  
615 and growth of the tectum and cerebellum by integrating Shh and Fgf8 signaling.  
616 *Development.* 2008 Jun;135(12):2093-103. PubMed PMID: 18480159. Pubmed Central  
617 PMCID: 2673693. Epub 2008/05/16. eng.



- 618 37. Yang ZJ, Ellis T, Markant SL, Read TA, Kessler JD, Bourbonoulas M, et al.  
619 Medulloblastoma can be initiated by deletion of Patched in lineage-restricted progenitors  
620 or stem cells. *Cancer Cell*. 2008 Aug 12;14(2):135-45. PubMed PMID: 18691548.  
621 Pubmed Central PMCID: PMC2538687. Epub 2008/08/12. eng.
- 622 38. Corrales JD, Rocco GL, Blaess S, Guo Q, Joyner AL. Spatial pattern of sonic  
623 hedgehog signaling through Gli genes during cerebellum development. *Development*.  
624 2004 Nov;131(22):5581-90. PubMed PMID: 15496441. Epub 2004/10/22. eng.
- 625 39. De Luca A, Parmigiani E, Tosatto G, Martire S, Hoshino M, Buffo A, et al.  
626 Exogenous sonic hedgehog modulates the pool of GABAergic interneurons during  
627 cerebellar development. *Cerebellum*. 2015 Apr;14(2):72-85. PubMed PMID: 25245619.  
628 Epub 2014/09/24. eng.
- 629 40. Lao Z, Raju GP, Bai CB, Joyner AL. MASTR: a technique for mosaic mutant  
630 analysis with spatial and temporal control of recombination using conditional floxed  
631 alleles in mice. *Cell reports*. 2012 Aug 30;2(2):386-96. PubMed PMID: 22884371.  
632 Pubmed Central PMCID: 3460375. Epub 2012/08/14. eng.
- 633 41. Matei V, Pauley S, Kaing S, Rowitch D, Beisel KW, Morris K, et al. Smaller  
634 inner ear sensory epithelia in Neurog 1 null mice are related to earlier hair cell cycle exit.  
635 *Dev Dyn*. 2005 Nov;234(3):633-50. PubMed PMID: 16145671. Pubmed Central PMCID:  
636 1343505. Epub 2005/09/08. eng.
- 637 42. Lumpkin EA, Collisson T, Parab P, Omer-Abdalla A, Haeberle H, Chen P, et al.  
638 Math1-driven GFP expression in the developing nervous system of transgenic mice. *Gene*  
639 *Expr Patterns*. 2003 Aug;3(4):389-95. PubMed PMID: 12915300. Epub 2003/08/14. eng.

- 640 43. Mignone JL, Kukekov V, Chiang AS, Steindler D, Enikolopov G. Neural stem  
641 and progenitor cells in nestin-GFP transgenic mice. *The Journal of comparative*  
642 *neurology* 2004 Feb 9;469(3):311-24. PubMed PMID: 14730584. Epub 2004/01/20. eng.
- 643 44. Schuller U, Heine VM, Mao J, Kho AT, Dillon AK, Han YG, et al. Acquisition of  
644 granule neuron precursor identity is a critical determinant of progenitor cell competence  
645 to form Shh-induced medulloblastoma. *Cancer Cell*. 2008 Aug 12;14(2):123-34. PubMed  
646 PMID: 18691547. Pubmed Central PMCID: PMC2597270. Epub 2008/08/12. eng.
- 647 45. Orvis GD, Hartzell AL, Smith JB, Barraza LH, Wilson SL, Szulc KU, et al. The  
648 engrailed homeobox genes are required in multiple cell lineages to coordinate sequential  
649 formation of fissures and growth of the cerebellum. *Dev Biol*. 2012 Jul 1;367(1):25-39.  
650 PubMed PMID: 22564796. Pubmed Central PMCID: PMC4038292. Epub 2012/05/09.  
651 eng.
- 652 46. Klein RS, Rubin JB, Gibson HD, DeHaan EN, Alvarez-Hernandez X, Segal RA,  
653 et al. SDF-1 alpha induces chemotaxis and enhances Sonic hedgehog-induced  
654 proliferation of cerebellar granule cells. *Development*. 2001;128(11):1971-81.
- 655 47. Tissir F, Wang CE, Goffinet AM. Expression of the chemokine receptor Cxcr4  
656 mRNA during mouse brain development. *Brain Res Dev Brain Res*. 2004 Mar  
657 22;149(1):63-71. PubMed PMID: 15013630. Epub 2004/03/12. eng.
- 658 48. Banisadr G, Podojil JR, Miller SD, Miller RJ. Pattern of CXCR7 Gene Expression  
659 in Mouse Brain Under Normal and Inflammatory Conditions. *J Neuroimmune Pharmacol*.  
660 2016 Mar;11(1):26-35. PubMed PMID: 25997895. Pubmed Central PMCID:  
661 PMC4831709. Epub 2015/05/23. eng.

662 49. Inaguma S, Riku M, Ito H, Tsunoda T, Ikeda H, Kasai K. GLI1 orchestrates  
663 CXCR4/CXCR7 signaling to enhance migration and metastasis of breast cancer cells.  
664 Oncotarget. 2015 Oct 20;6(32):33648-57. PubMed PMID: 26413813. Pubmed Central  
665 PMCID: PMC4741792. Epub 2015/09/29. eng.

666 50. Tan IL, Wojcinski A, Rallapalli H, Lao Z, Sanghrajka RM, Stephen D, et al.  
667 Lateral cerebellum is preferentially sensitive to high sonic hedgehog signaling and  
668 medulloblastoma formation. Proc Natl Acad Sci U S A. 2018 Mar 27;115(13):3392-7.  
669 PubMed PMID: 29531057. Pubmed Central PMCID: PMC5879676. Epub 2018/03/14.  
670 eng.

671

672

673

674

675

676

677

678

679

680

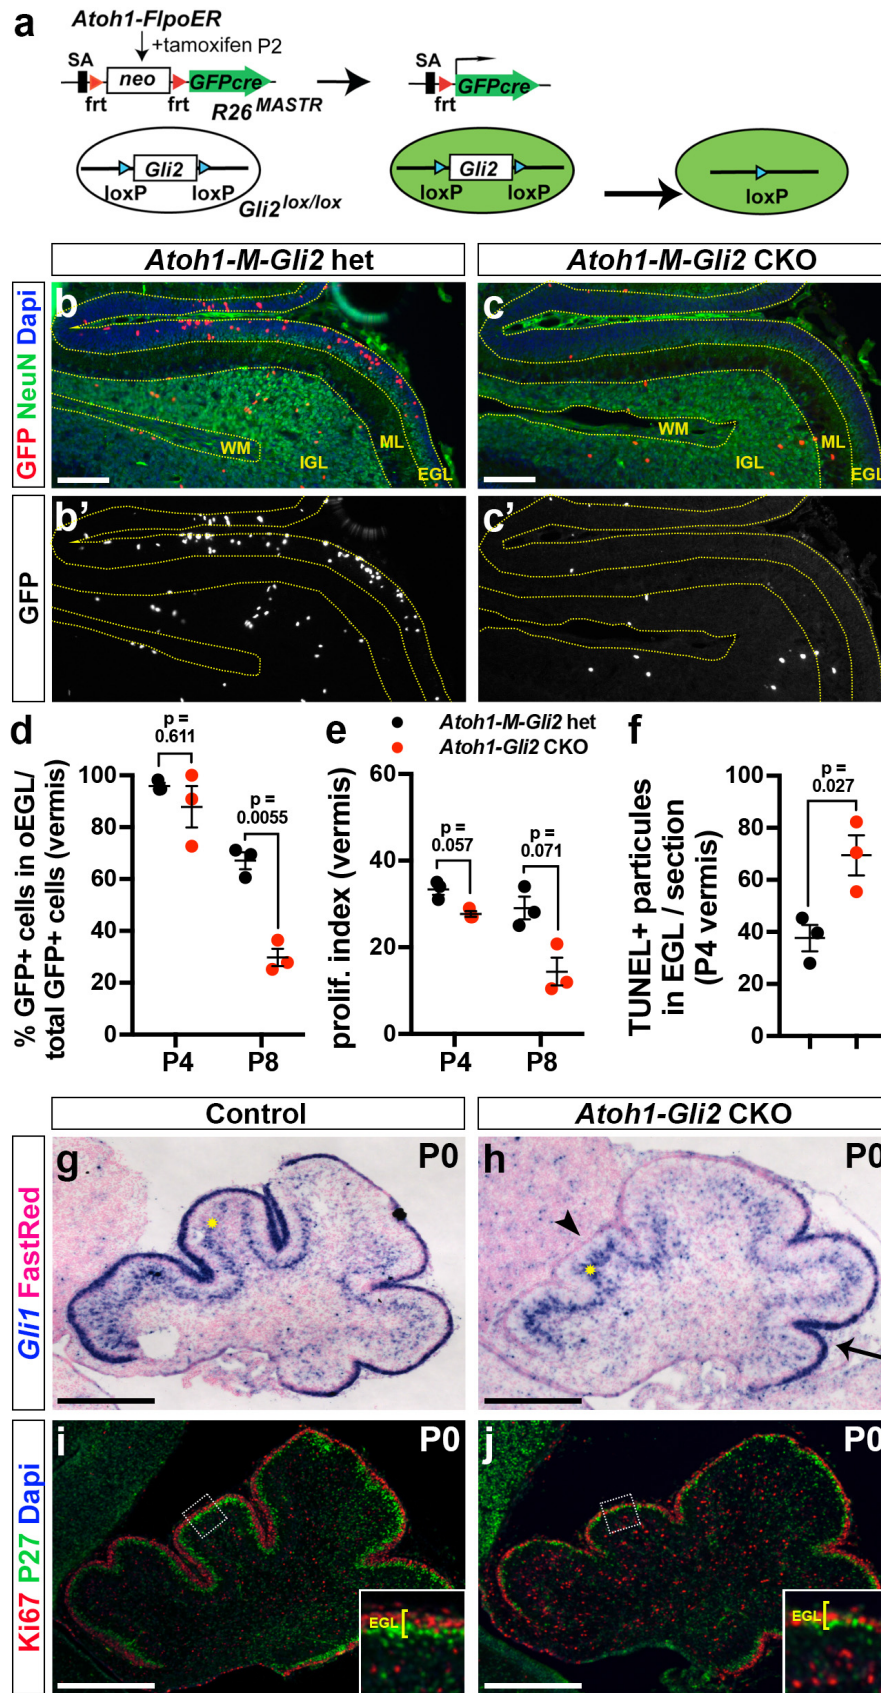

682 **Fig. 1. HH-GLI2 signaling maintains GCP in an undifferentiated state and promotes**  
683 **their survival. (a)** Schematic representation of the MASTR approach. The  $R26^{MASTR}$   
684 allele expresses a GFPcre fusion upon Flp induced deletion of a *neo* (STOP) cassette.  
685 When the  $R26^{MASTR}$  allele and the *Atoh1-FlpoER* transgene are combined with a floxed  
686 gene such as *Gli2*, recombination of the loxP sites occurs in >98% of GFP+ cells within 3  
687 days of administrating tamoxifen (Tm) at P2. The mutant cells and their progeny can  
688 subsequently be identified by the continuous expression of eGFP from the  $R26$  allele. **(b-**  
689 **c)** Fluorescent Immuno-Histo-Chemical (FIHC) detection of the indicated proteins and  
690 dapi on mid-sagittal sections (lobule VII and VIII) of P8 control  $R26^{MASTR/+}; Atoh1-$   
691  $FlpoER/+; Gli2^{lox/+}$  (*Atoh1-M-Gli2* het, **b**) and  $R26^{MASTR/+}; Atoh1-FlpoER/+; Gli2^{lox/lox}$   
692 (*Atoh1-M-Gli2* CKO, **c**) mice treated Tm at P2. **(d-f)** Graphs of the proportion of GFP+  
693 cells in the outer (o) EGL at P8 (n=3) **(d)**, the proliferation index at P8 (% [GFP+ EdU+]  
694 cells of all [GFP+] cells in the oEGL) (n=3) **(e)** and the number TUNEL+ particles per  
695 section at P4 (n=3) **(f)** in *Atoh1-M-Gli2* het (control, black) and  $R26^{MASTR/+}; Atoh1-$   
696  $FlpoER/+; Gli2^{lox/lox}$  (*Atoh1-M-Gli2* CKO, red) mice treated Tm at P2. All of the  
697 analyses were performed on 3 midline sections per brain. All graphical data are presented  
698 as means  $\pm$  SEM and significance determined using two-tailed T-test. **(g-h)** *In situ*  
699 hybridization of *Gli1* mRNA on P0 mid-sagittal cerebellar sections of  $Gli2^{lox/lox}$  (control,  
700 **g**) and  $Atoh1-Cre/+; Gli2^{lox/lox}$  (*Atoh1-Gli2* CKO, **h**). Arrowheads indicate the loos of  
701 *Gli1* expression in the EGL and yellow asterisks indicate *Gli1* expression in Bergmann  
702 glia in the Purkinje Cell Layer (PCL). **(i-j)** FIHC detection of the indicated proteins and  
703 dapi on P0 mid-sagittal cerebellar sections of  $Gli2^{lox/lox}$  (control, **I**) and  $Atoh1-Cre/+;$   
704  $Gli2^{lox/lox}$  (*Atoh1-Gli2* CKO, **J**). High power images are shown of the areas indicated by



705 white rectangles and the thickness of the EGL is indicated by yellow bracket. Scale bars  
 706 represent 100 $\mu$ m (b-c) and 500 $\mu$ m (g-j).

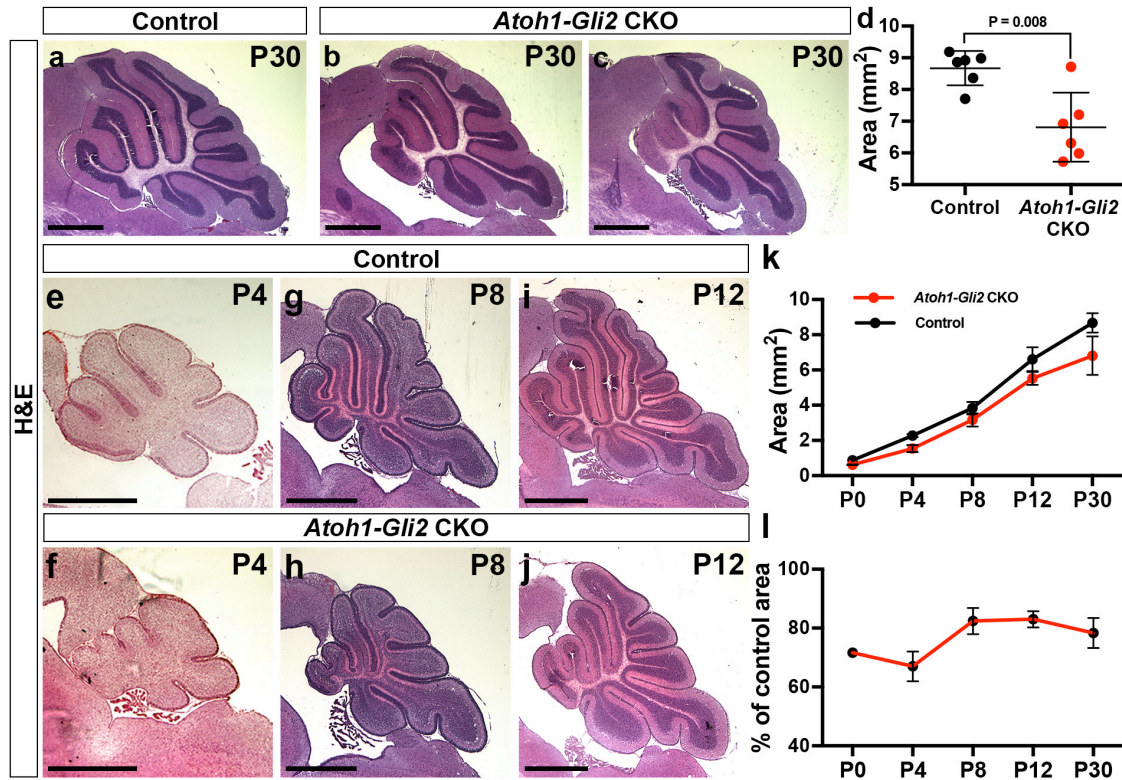

707

708 **Fig. 2. The size of the cerebellum partially recovers in *Atoh-Gli2* CKOs over time.**

709 (a-c) Mid-sagittal sections of P30 *Gli2*<sup>lox/lox</sup> (control, a) and *Atoh1-Cre/+; Gli2*<sup>lox/lox</sup>

710 (*Atoh1-Gli2* CKO, b-c) cerebellum stained with Hematoxylin and Eosin (H&E). (d)

711 Graph of the area of mid-sagittal CB sections of P30 *Gli2*<sup>lox/lox</sup> (control, black) (n=6) and

712 *Atoh1-Cre/+; Gli2*<sup>lox/lox</sup> (*Atoh1-Gli2* CKO, red) (n=6) mice. (e-j) Mid-sagittal CB

713 sections of P4 (e-f), P8 (g-h) and P12 (i-j) *Gli2*<sup>lox/lox</sup> (control, e, g and i) and *Atoh1-*

714 *Cre/+; Gli2*<sup>lox/lox</sup> (*Atoh1-Gli2* CKO, f, h and j) mice stained with H&E. (k) Graph of the

715 area of 3 mid-sagittal sections of *Gli2*<sup>lox/lox</sup> (control, P0: n=3, P4: n=3, P8: n=3, P12: n=3

716 and P30: n=6) and *Atoh1-Cre/+; Gli2*<sup>lox/lox</sup> (*Atoh1-Gli2* CKO, P0: n=3, P4: n=2, P8: n=6,

717 P12: n=6 and P30: n=7) cerebella. **(I)** Graph showing the decrease in area of 3 mid-sagittal  
718 sections as a percentage of *Atoh1-Gli2* CKO cerebella during development. All graphical  
719 data are presented as means  $\pm$  SEM and significance determined using two-tailed T-test.  
720 Scale bars represent 1mm.

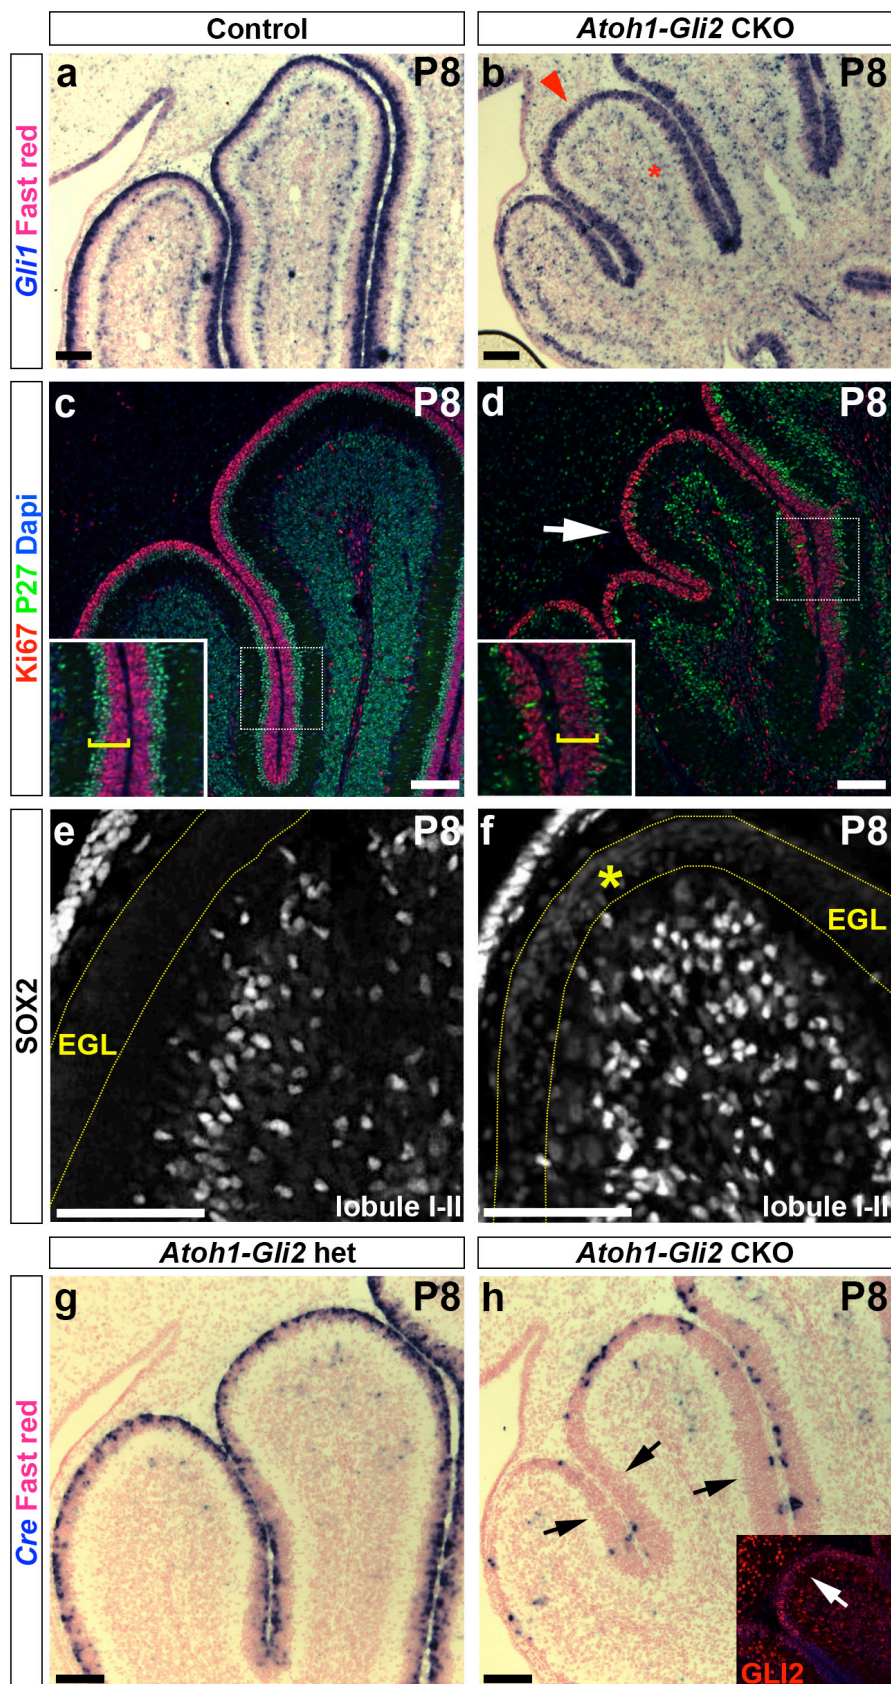



722 **Fig. 3. Loss of *Gli2* mutant GCPs at P0 is compensated by wild type (WT) cells at P8.**  
723 **(a-b)** *In situ* RNA hybridization analysis of *Gli1* on P8 midsagittal cerebellar sections of  
724 *Gli2<sup>lox/lox</sup>* (control, **a**) and *Atoh1-Cre/+; Gli2<sup>lox/lox</sup>* (*Atoh1-Gli2* CKO, **b**) mice. Red  
725 arrowhead indicates the strong *Gli1* expression in the mutant EGL and red asterisks  
726 indicate normal *Gli1* expression in Bergmann glia in the Purkinje Cell Layer (PCL). **(c-f)**  
727 FIHC detection of the indicated proteins and dapi on P8 mid-sagittal cerebellar sections  
728 of *Gli2<sup>lox/lox</sup>* (control, **c and e**) and *Atoh1-Cre/+; Gli2<sup>lox/lox</sup>* (*Atoh1-Gli2* CKO, **d and f**)  
729 mice. High power images are shown of the areas indicated by white rectangles in **c** and **d**  
730 with the thickness of the EGL indicated by yellow brackets. The white arrow in **d**  
731 indicates the proliferating EGL. **(e and f)** high magnification in lobule I-II region. EGL  
732 is indicated by the yellow dotted line and yellow asterisk indicates low level of SOX2  
733 expression in the mutant EGL. **(g-h)** *In situ* hybridization of *Cre* RNA on P8 midsagittal  
734 cerebellar sections of *Gli2<sup>lox/lox</sup>* (control, **g**) and *Atoh1-Cre/+; Gli2<sup>lox/lox</sup>* (*Atoh1-Gli2* CKO,  
735 **h**) mice. Black arrows indicate the loss of *Cre* expression in the partially rescued EGL.  
736 White arrow indicates the presence of GLI2 protein in the EGL (inset, **h**). Scale bars  
737 represent 100 $\mu$ m.

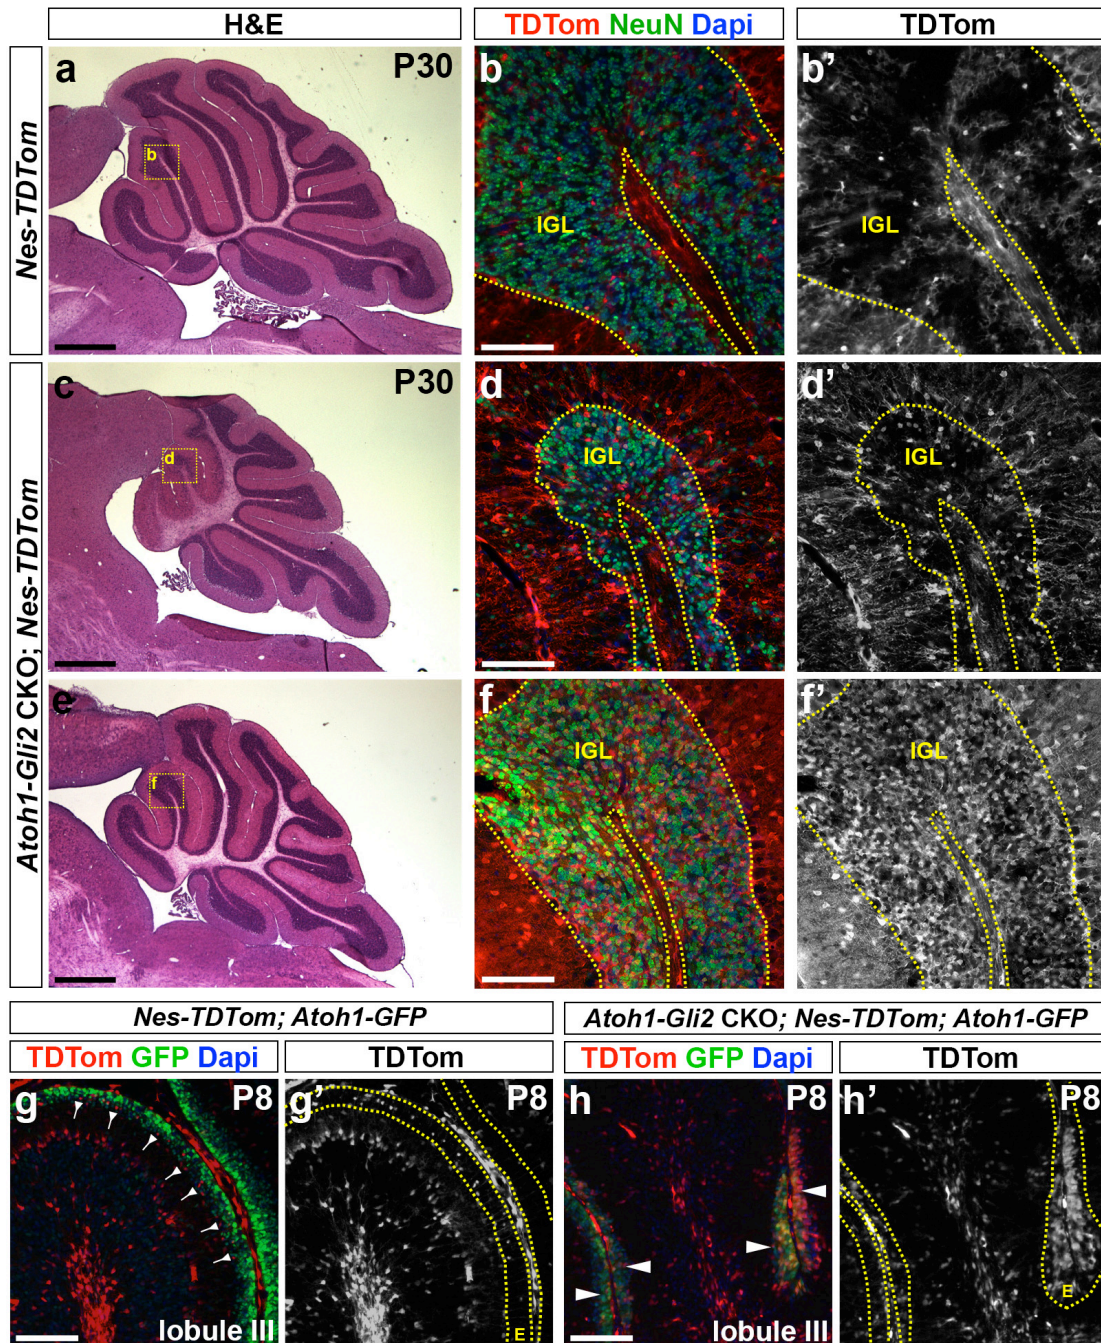

738

739 **Fig. 4. Nestin-Expressing Progenitors (NEPs) populate the EGL, express GCP**  
 740 **markers and produce granule cells in response to loss of *Gli2* in the EGL. (a, c and**  
 741 **e) H&E staining of sagittal sections of the vermis of P30 *Nes-FlpoER/+; R26<sup>FSF-TDTom/+</sup>***  
 742 **(*Nes-TDTom*, a) and *Atoh1-Cre/+; Gli2<sup>lox/lox</sup>; Nes-FlpoER/+; R26<sup>FSF-TDTom/+</sup>* (*Atoh1-Gli2***

743 CKO; *Nes-TDTom*, **c and e**) mice injected with Tm at P0. **(b, d and f)** FIHC detection of  
 744 the indicated proteins and dapi on mid-sagittal cerebellar sections at P30. High power  
 745 images are shown of the areas indicated by yellow rectangles in **a, c and e**. IGL is  
 746 outlined by the yellow dotted line. **(g-h)** FIHC detection of the indicated proteins and  
 747 dapi on mid-sagittal cerebellar sections (lobule III) of P8 *Nes-FlpoER/+; R26<sup>FSF-TDTom/+</sup>*;  
 748 *Atoh1-GFP/+ (Nes-TDTom; Atoh1-GFP, g)* and *Atoh1-Cre/+; Gli2<sup>lox/lox</sup>; Nes-FlpoER/+;*  
 749 *R26<sup>FSF-TDTom/+</sup>; Atoh1-GFP/+ (Atoh1-Gli2 CKO; Nes-TDTom; Atoh1-GFP, h)* mice  
 750 injected with Tm at P0. The EGL (E) is outlined by the yellow dotted lines. Backward  
 751 arrows indicate TDTom+ and Atoh1-GFP- cells in the inner EGL. White arrowheads  
 752 indicate TDTom+ and Atoh1-GFP+ cells in the inner EGL. Scale bars represent 1mm (**a,**  
 753 **c and e**) and 100 $\mu$ m (**b, d, f, g and h**).

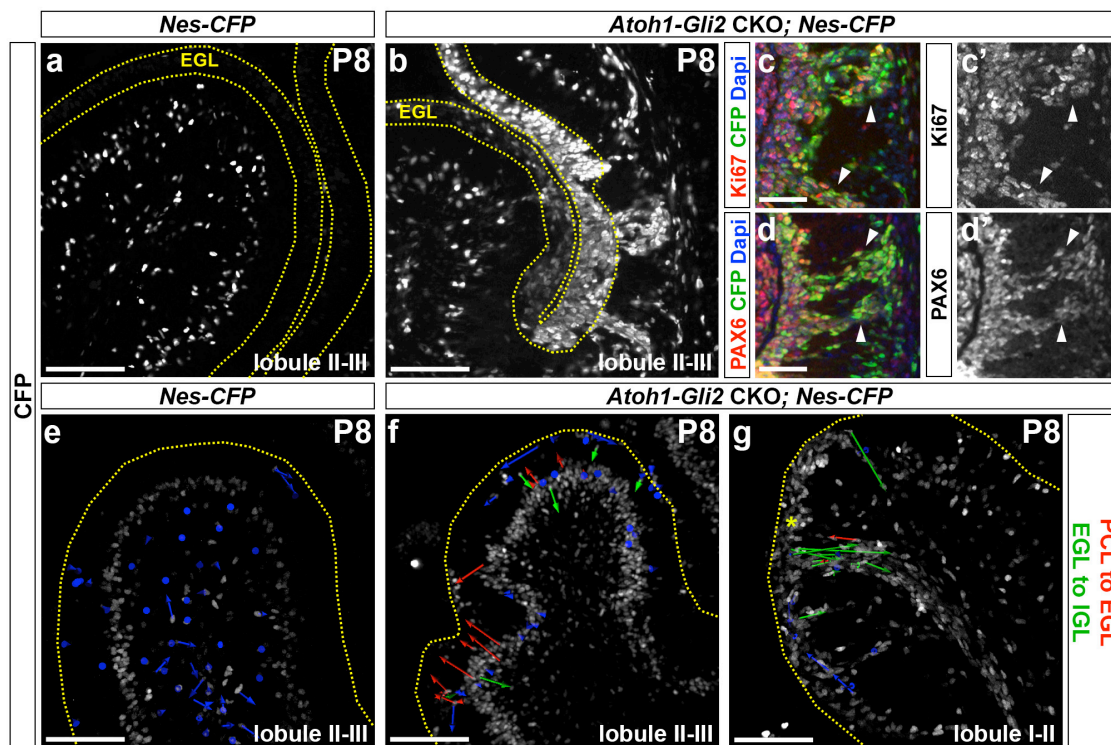

754

755 **Fig. 5. PCL NEPs migrate to the EGL and a subset of proliferating NEP-derived**



756 **GCP-like cells migrate back into the cerebellar cortex in streams.** (a-b) FIHC  
757 detection of CFP protein on mid-sagittal cerebellar sections (lobule II-III) of P8 *Nes-*  
758 *CFP/+* (*Nes-CFP*, **a**) and *Atoh1-Cre/+; Gli2<sup>lox/lox</sup>; Nes-CFP/+* (*Atoh1-Gli2* CKO; *Nes-*  
759 *CFP*, **b**) mice. The EGL is indicated by the yellow dotted lines. (c-d) FIHC detection of  
760 the indicated proteins and dapi on high magnifications focusing on CFP+ streams of mid-  
761 sagittal cerebellar sections of P8 *Atoh1-Cre/+; Gli2<sup>lox/lox</sup>; Nes-CFP/+* (*Atoh1-Gli2* CKO;  
762 *Nes-CFP*) mice. White arrowheads indicate co-localization of CFP with the indicated  
763 protein. (e-g) Detection of native CFP fluorescence on sagittal slice cultures of the vermis  
764 (lobule II-III, **e and f** and lobule I-II, **g**) of P8 *Nes-CFP/+* (*Nes-CFP*, **e**) and *Atoh1-*  
765 *Cre/+; Gli2<sup>lox/lox</sup>; Nes-CFP/+* (*Atoh1-Gli2* CKO; *Nes-CFP*, **f and g**) mice showing  
766 displacement of CFP+ cells during 6h of imaging. Arrow color code is as indicated. The  
767 upper edge of the EGL is indicated by a yellow dotted line. Scale bars represent 100µm  
768 (a-b and e-g) and 50µm (c-d).

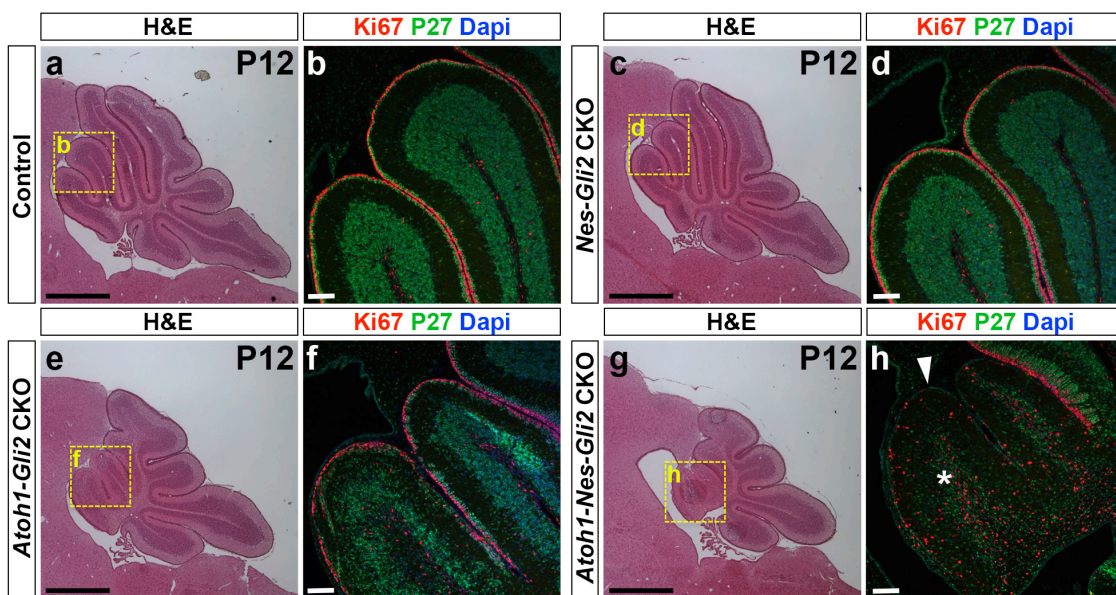

769

770 **Fig. 6. Inactivation of *Gli2* in both *Nestin*- and *Atoh1*-expressing cells inhibits the**

771 **recovery of the CB compared to in mice lacking *Gli2* only in the EGL. (a, c, e and g)**  
772 H&E of sagittal sections of the cerebellar vermis of P12 *Gli2<sup>lox/lox</sup>* (Control, **a**), *Nes-*  
773 *FlpoER/+; R26<sup>MASTR/+</sup>; Gli2<sup>lox/lox</sup>* (*Nes-Gli2* CKO, **c**), *Atoh1-Cre/+; Gli2<sup>lox/lox</sup>* (*Atoh1-*  
774 *Gli2* CKO, **e**), and *Atoh1-Cre/+; Nes-FlpoER/+; R26<sup>MASTR/+</sup>; Gli2<sup>lox/lox</sup>* (*Atoh1-Nes-Gli2*  
775 CKO, **g**) mice injected with Tm at P0. Note that inactivation of *Gli2* only in *Nestin-*  
776 expressing cells has no major effect of CB development at P12. However, inactivation of  
777 *Gli2* in *Nestin*-expressing cells inhibits the compensation mechanism when *Gli2* is  
778 removed in GCPs (**g** compared to **e**). (**b, d, f and h**) High magnifications (as shown by  
779 yellow squares in **a, c, e and g**) of anterior vermis of P12 *Gli2<sup>lox/lox</sup>* (**b**), *Nes-FlpoER/+;*  
780 *R26<sup>MASTR/+</sup>; Gli2<sup>lox/lox</sup>* (*Nes-Gli2* CKO, **d**), *Atoh1-Cre/+; Gli2<sup>lox/lox</sup>* (*Atoh1-Gli2* CKO, **f**),  
781 and *Atoh1-Cre/+; Nes-FlpoER/+; R26<sup>MASTR/+</sup>; Gli2<sup>lox/lox</sup>* (*Atoh1-Nes-Gli2* CKO, **h**)  
782 cerebella stained with the indicated proteins and dapi. White arrowhead and white  
783 asterisk indicate the loss of EGL and IGL respectively in *Atoh1-Nes-Gli2* CKO. Scale  
784 bars represent 1mm (**a, c, e and g**) and 100 $\mu$ m (**b, d, f and h**).

785

786

787

788

789

790

791

792 **Supplementary material:**

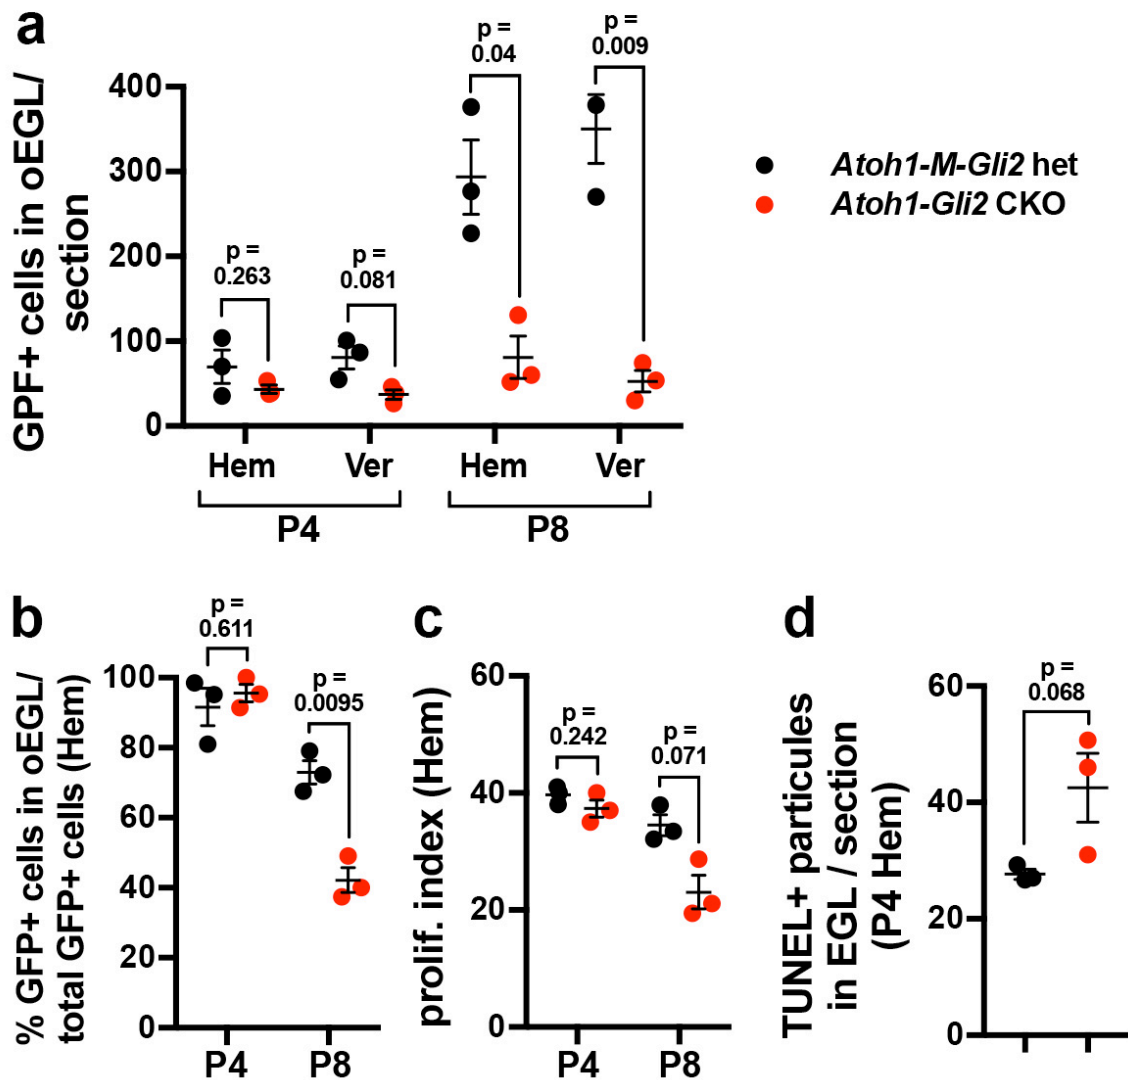

794 **Fig. S1. Similar to vermis, SHH/Gli2 maintains GCP in an undifferentiated state**  
 795 **and promotes their survival in the hemisphere. (a)** Graphs of the number of GFP+  
 796 cells in in outer (o) at P4 (n=3) and P8 (n=3) in both hemisphere and vermis of  
 797  $R26^{MASTR/+}; Atoh1-FlpoER/+; Gli2^{lox/+}$  (*Atoh1-M-Gli2* het, black) and  $R26^{MASTR/+}; Atoh1-$   
 798  $FlpoER/+; Gli2^{lox/lox}$  (*Atoh1-M-Gli2* CKO, red) mice treated Tm at P2 **(b-d)** Graphs of  
 799 the proportion of CFP+ cells in in outer (o) EGL at P8 (n=3) **(b)**, the proliferation index

800 at P8 (% [GFP+ EdU+] cells of all [GFP+] cells in the oEGL) (n=3) (c) and the number  
801 TUNEL+ particles per section at P4 (n=3) (d) in the hemisphere of  $R26^{MASTR/+}$ ;  $Atoh1-$   
802  $FlpoER/+$ ;  $Gli2^{lox/+}$  ( $Atoh1-M-Gli2$  het, black) and  $R26^{MASTR/+}$ ;  $Atoh1-FlpoER/+$ ;  
803  $Gli2^{lox/lox}$  ( $Atoh1-M-Gli2$  CKO, red) mice treated Tm at P2. All of the analyses were  
804 performed on 3 sections per region and per brain. All graphical data are presented as  
805 means  $\pm$  SEM and significance determined using two-tailed.

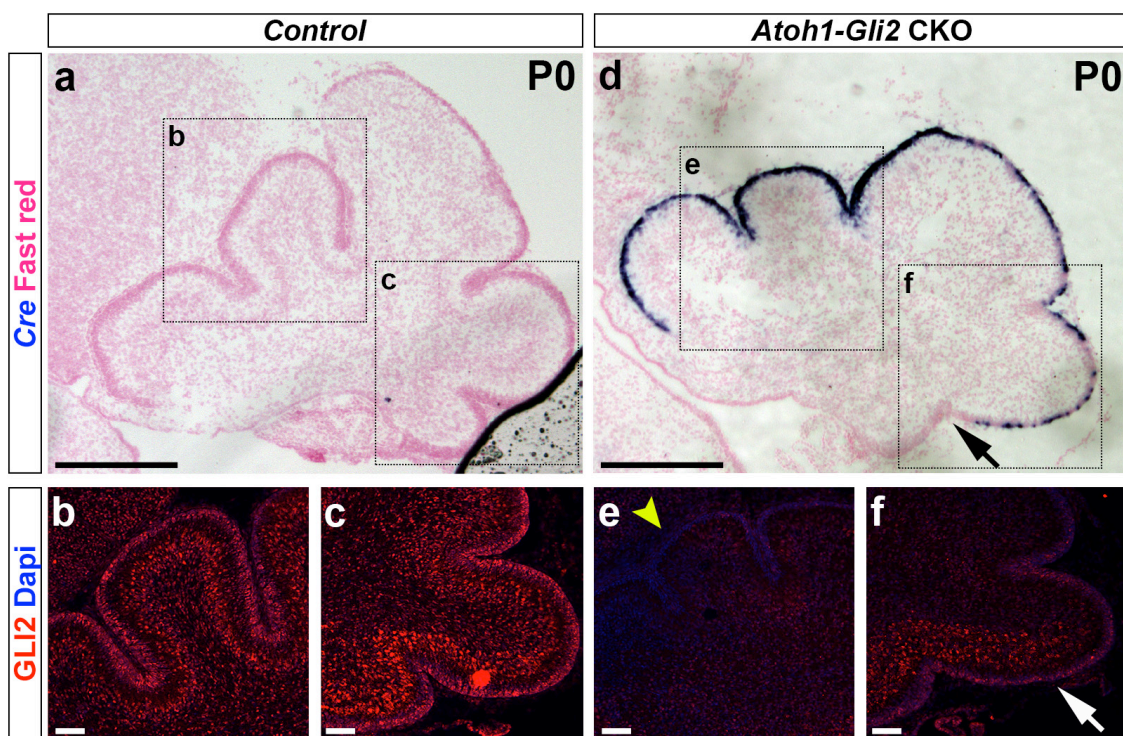

806

807 **Fig. S2. GLI2 protein is lost in P0  $Atoh1-Gli2$  CKO EGL.** (a and d) *In situ*  
808 hybridization of *Cre* mRNA on P0 mid-sagittal cerebellar sections of  $Gli2^{lox/lox}$  (control,  
809 a) and  $Atoh1-Cre/+$ ;  $Gli2^{lox/lox}$  ( $Atoh1-Gli2$  CKO, d) mice. Black arrows indicate the lack  
810 of *Cre* expression in the most posterior part of the CB. (b-c and e-f) FIHC detection of  
811 GLI2 protein and dapi in the indicated regions (as shown by black squares in a and d) in  
812 P0  $Gli2^{lox/lox}$  (control, b-c) and  $Atoh1-Cre/+$ ;  $Gli2^{lox/lox}$  ( $Atoh1-Gli2$  CKO, e-f) CB.



813 Yellow arrowhead in e and white arrow in F indicate respectively the absence and  
814 presence of GLI2 protein in the EGL. Scale bars represent 1mm (a and d) and 100 $\mu$ m (b-  
815 c and e-f).

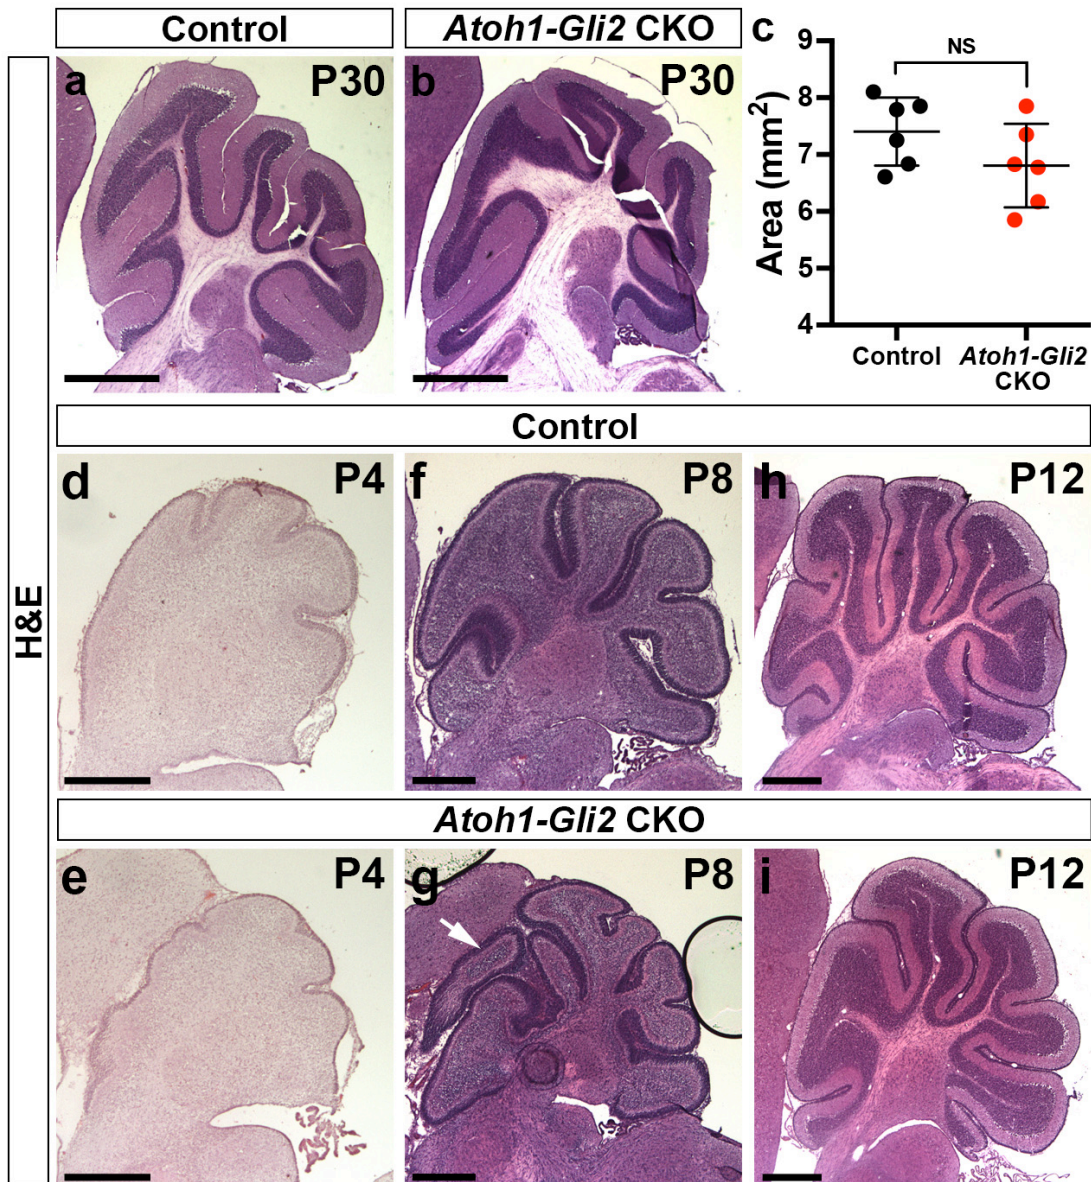

816

817 **Fig. S3. Hemisphere recovers better than vermis in *Atoh1-Gli2* CKO mice. (a-b)**

818 hemispheric sagittal sections of P30 *Gli2*<sup>lox/lox</sup> (control, a) and *Atoh1-Cre*<sup>+/+</sup>; *Gli2*<sup>lox/lox</sup>

819 (*Atoh1-Gli2* CKO, **b**) cerebellum stained with Hematoxylin/Eosin (H&E). (**C**) Graph of  
820 the area of hemispheric sagittal sections of P30 *Gli2<sup>lox/lox</sup>* (control, black) (n=6) and *Atoh1-*  
821 *Cre/+; Gli2<sup>lox/lox</sup>* (*Atoh1-Gli2* CKO, red) (n=6) CB. (**d-i**) Hemispheric sagittal sections of  
822 P4 (**d-e**), P8 (**f-g**) and P12 (**h-i**) *Gli2<sup>lox/lox</sup>* (control, **d, f and h**) and *Atoh1-Cre/+; Gli2<sup>lox/lox</sup>*  
823 (*Atoh1-Gli2* CKO, **e, g and i**) cerebellum stained with H&E. White arrow indicates the  
824 presence of extra folia. Scale bars represent 1mm (**a-b**) and 500 $\mu$ m (**b-c and d-i**).

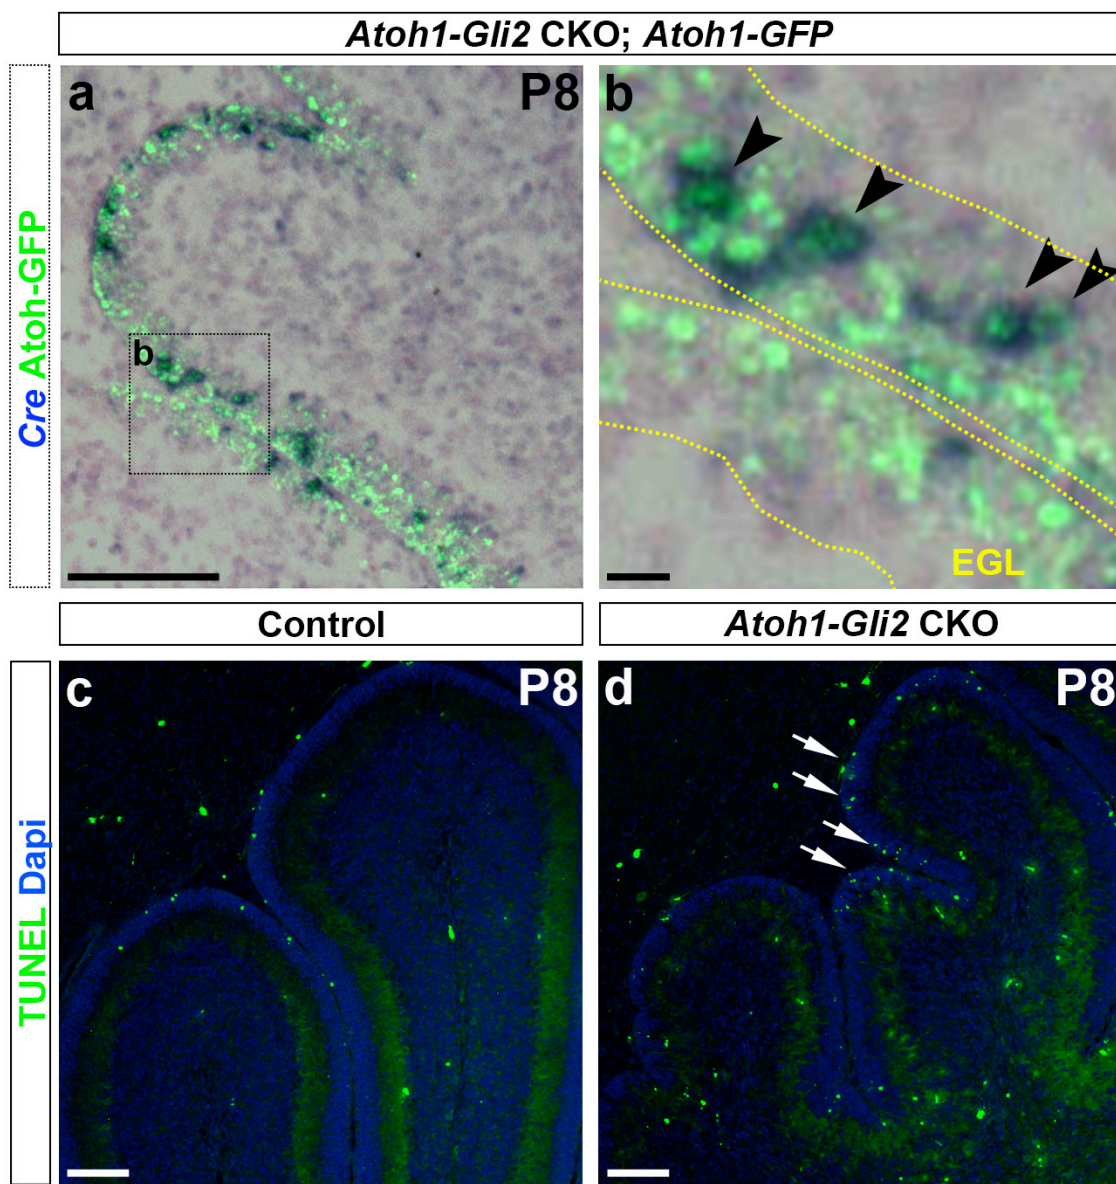

825



826 **Fig. S4. Rescued EGL still exhibits an increase in cell death.** (a-b) Detection of native  
827 GFP fluorescence and *In situ* hybridization of *Cre* mRNA on mid-sagittal section (lobule  
828 II-III) of P8 *Atoh1-Cre/+; Gli2<sup>lox/lox</sup>; Atoh1-GFP/+* (*Atoh1-Gli2* CKO; *Atoh1-GFP*) mice.  
829 High power image is shown of the area indicated by black rectangles in **a**. in **b**, EGL is  
830 indicated by the yellow dotted line and black arrowheads indicate ATOH1-GFP+/ *Cre*+  
831 cells. (c- d) TUNEL and dapi detection on mid-sagittal sections of P8 *Gli2<sup>lox/lox</sup>* (Control)  
832 and *Atoh1-Cre/+; Gli2<sup>lox/lox</sup>* (*Atoh1-Gli2* CKO) CB. White arrows indicate the presence  
833 of in the EGL (d). Scale bars represent 100 $\mu$ m (a and c-b) and 10 $\mu$ m (b).

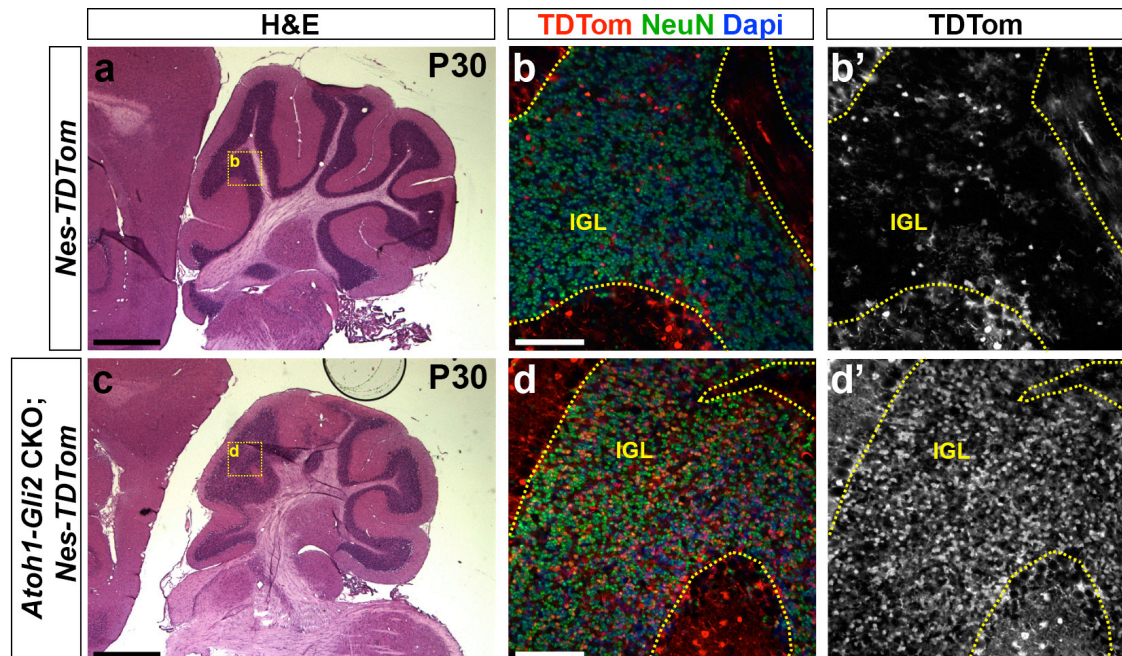

834

835 **Fig. S5. Nestin-Expressing Progenitors (NEPs) differentiate into Granule neurons in**  
836 **response to loss of Gli2 in the hemisphere.** (a and c) H&E of hemispheric sagittal  
837 sections of P30 *Nes-FlpoER/+; R26<sup>FSF-TDTom/+</sup>* (*Nes-TDTom*, **a**) and *Atoh1-Cre/+;*  
838 *Gli2<sup>lox/lox</sup>; Nes-FlpoER/+; R26<sup>FSF-TDTom/+</sup>* (*Atoh1-Gli2* CKO; *Nes-TDTom*, **c**) mice  
839 injected with Tm at P0. (b and d) FIHC detection of the indicated proteins and dapi on

840 hemispheric sagittal cerebellar sections at P30. High power images are shown of the areas  
841 indicated by yellow rectangles in (a and c). IGL is indicated by the yellow dotted line.  
842 Scale bars represent 1mm (a and c) and 100 $\mu$ m (b and d).

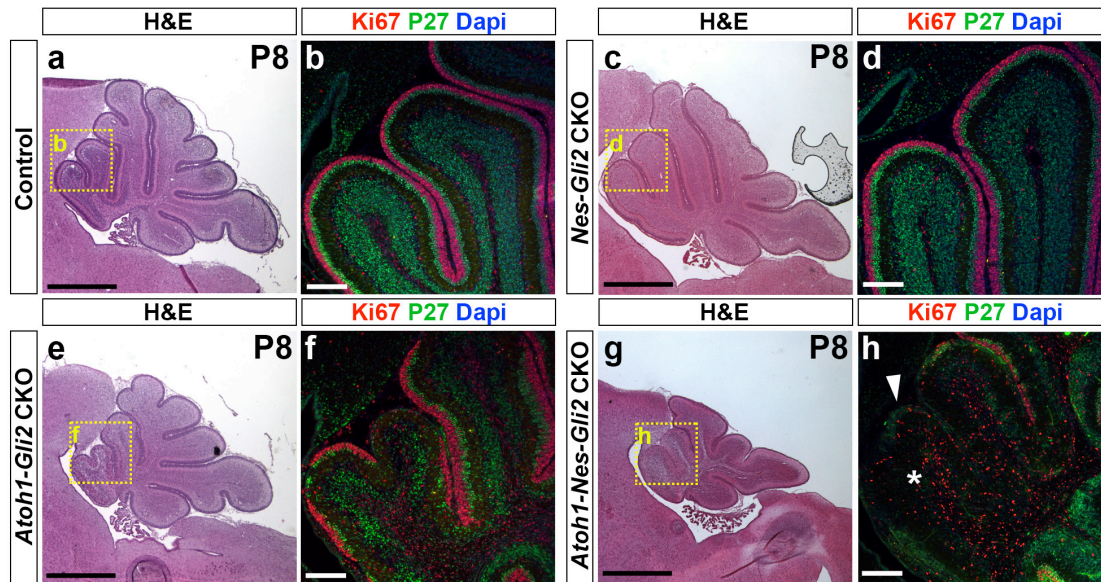

843

844 **Fig. S6. Inactivation of Gli2 in both *Nestin* and *Atoh1* expressing cells inhibits the**  
845 **recovery of the CB. (a, c, e and g) H&E of sagittal sections of the cerebellar vermis of**  
846 **P8 *Gli2*<sup>flox/flox</sup> (Control, a), *Nes-FlpoER*<sup>+/+</sup>; *R26*<sup>MASTR</sup><sup>+/+</sup>; *Gli2*<sup>flox/flox</sup> (*Nes-Gli2* CKO, c),**  
847 ***Atoh1-Cre*<sup>+/+</sup>; *Gli2*<sup>flox/flox</sup> (*Atoh1-Gli2* CKO, e), and *Atoh1-Cre*<sup>+/+</sup>; *Nes-FlpoER*<sup>+/+</sup>;**  
848 ***R26*<sup>MASTR</sup><sup>+/+</sup>; *Gli2*<sup>flox/flox</sup> (*Atoh1-Nes-Gli2* CKO, g) mice injected with Tm at P0. Note that**  
849 **inactivation of *Gli2* only in *Nestin*-expressing cells has no major effect at P8. However,**  
850 **inactivation of *Gli2* in *Nestin*-expressing cells inhibits the compensation mechanism (g**  
851 **compared to e). (b, d, f and h) Close-up (as shown by yellow squares in a, c, e and g) of**  
852 **anterior vermis of P8 *Gli2*<sup>flox/flox</sup> (b), *Nes-FlpoER*<sup>+/+</sup>; *R26*<sup>MASTR</sup><sup>+/+</sup>; *Gli2*<sup>flox/flox</sup> (*Nes-Gli2***  
853 **CKO, d), *Atoh1-Cre*<sup>+/+</sup>; *Gli2*<sup>flox/flox</sup> (*Atoh1-Gli2* CKO, f), and *Atoh1-Cre*<sup>+/+</sup>; *Nes-***  
854 ***FlpoER*<sup>+/+</sup>; *R26*<sup>MASTR</sup><sup>+/+</sup>; *Gli2*<sup>flox/flox</sup> (*Atoh1-Nes-Gli2* CKO, h) cerebella stained with**



855 indicated proteins and dapi. White arrowhead and white asterisk indicate the loss of EGL  
856 and IGL respectively in *Atoh1-Nes-Gli2* CKO. Scale bars represent 1mm (a, c, e and g)  
857 and 100 $\mu$ m (b, d, f and h).

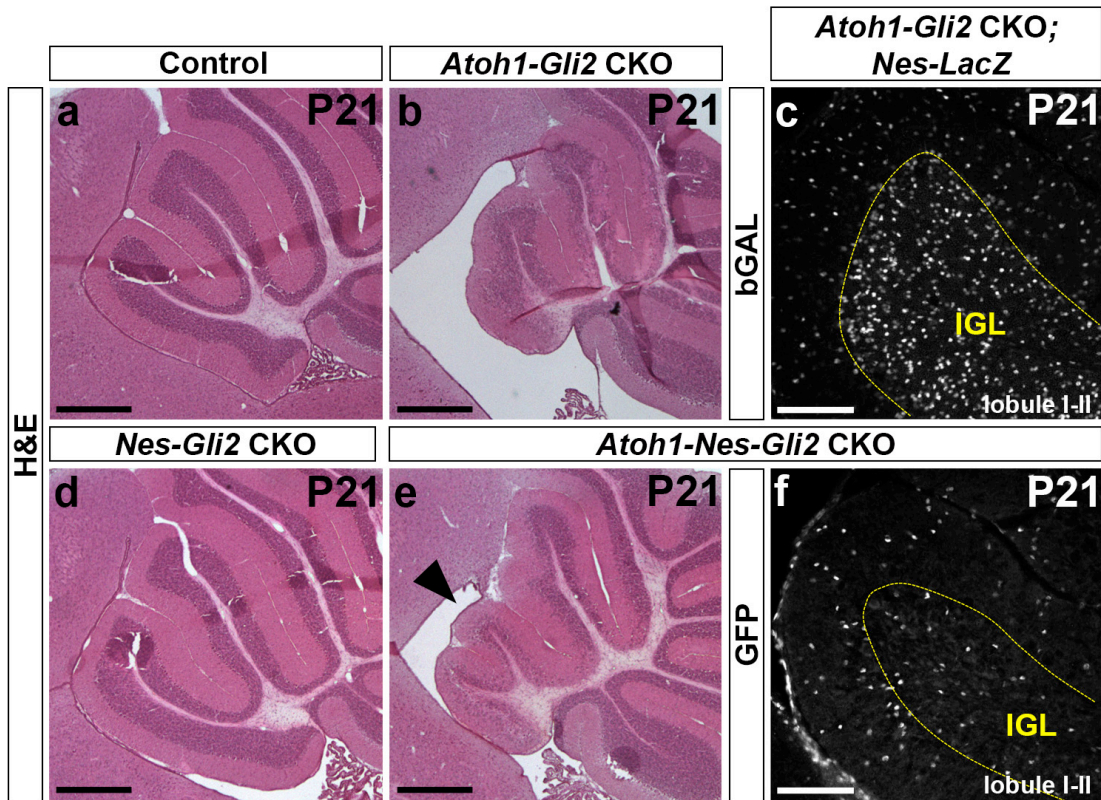

858

859 **Fig. S7. NEPs derived cells failed to populate the IGL at P21 (a, b, d and e)** H&E of  
860 sagittal sections of anterior cerebellar vermis of P21 *Gli2<sup>flx/flx</sup>* (Control, a), *Atoh1-*  
861 *Cre/+; Gli2<sup>flx/flx</sup>* (*Atoh1-Gli2* CKO, b), *Nes-FlpoER/+; R26<sup>MASTR/+</sup>; Gli2<sup>flx/flx</sup>* (*Nes-Gli2*  
862 CKO, d) and *Atoh1-Cre/+; Nes-FlpoER/+; R26<sup>MASTR/+</sup>; Gli2<sup>flx/flx</sup>* (*Atoh1-Nes-Gli2* CKO,  
863 e) mice injected with Tm at P0. Note that inactivation of *Gli2* in *Nestin*-expressing cells  
864 inhibits the compensation mechanism in the anterior vermis (black arrowhead in e). (c  
865 and f) FIHC detection of the indicated proteins on mid-sagittal cerebellar sections (lobule  
866 I-II) of P21 *Atoh1-Cre/+; Gli2<sup>flx/flx</sup>; Nes-FlpoER/+; R26<sup>FSF-LacZ/+</sup>* (*Atoh1-Gli2* CKO;

867 *Nes-LacZ*, **c**) and *Atoh1-Cre/+; Nes-FlpoER/+; R26<sup>MASTR/+</sup>; Gli2<sup>lox/lox</sup>* (*Atoh1-Nes-Gli2*  
868 CKO, **f**) mice injected with Tm at P0. IGL is indicated by the yellow dotted line. Scale  
869 bars represent 500 $\mu$ m (**a, b, d and e**) and 100 $\mu$ m (**c and f**).

870

871 **Sup. video1. P8 WT cerebellum shows no obvious movement of NEPs towards the**  
872 **EGL.** Detection of native CFP fluorescence on sagittal slices of the vermis (lobule  
873 2/3) of P8 *Nes-CFP/+* mice showing displacement of CFP+ cells. Image stacks were  
874 acquired every 5min for 4h.

875

876 **Sup. video2. PCL NEPs migrate toward the EGL in *Atoh1-Gli2* CKO CB at P8.**  
877 Detection of native CFP fluorescence on sagittal slices of the vermis (lobule 2/3) of P8  
878 *Atoh1-Cre/+; Gli2<sup>lox/lox</sup>; Nes-CFP/+* (*Atoh1-Gli2* CKO; *Nes-CFP*) mice showing  
879 displacement of CFP+ cells. Image stacks were acquired every 5min for 4h.

880

881 **Sup. video3. A subset of NEP derived cells migrate from the EGL towards the**  
882 **IGL in *Atoh1-Gli2* CKO CB at P8.** Detection of native CFP fluorescence on sagittal  
883 slices of the vermis (lobule 1/2) of P8 *Atoh1-Cre/+; Gli2<sup>lox/lox</sup>; Nes-CFP/+* (*Atoh1-*  
884 *Gli2* CKO; *Nes-CFP*) mice showing displacement of CFP+ cells. Image stacks were  
885 acquired every 5min for 4h.

886

887
